# Supplementary material for: Experimental evidence for beneficial effects of projected climate change on hibernating amphibians
Source: PubMed Central journal article supplement (PMC4882615; doi:10.1038/srep26754), 2016-05-27

Supplementary Information for

Experimental evidence for beneficial effects of projected climate change on hibernating  
amphibians

Bálint Üveges, Katharina Mahr, Márk Szederkényi, Veronika Bókony, Herbert Hoi, Attila  
Hettyey

# Table of contents

|                                                              |           |
|--------------------------------------------------------------|-----------|
| <b>Supplementary Methods</b> .....                           | <b>3</b>  |
| <i>Detailed experimental design</i> .....                    | 3         |
| <i>Rationale for selected hibernation temperatures</i> ..... | 4         |
| <b>Supplementary Results</b> .....                           | <b>5</b>  |
| <i>Survival and body mass change after hibernation</i> ..... | 5         |
| <i>Effects of the larval environment</i> .....               | 6         |
| <b>Supplementary Discussion</b> .....                        | <b>6</b>  |
| <b>Supplementary References</b> .....                        | <b>7</b>  |
| <b>Supplementary Tables</b> .....                            | <b>9</b>  |
| Table S1.....                                                | 9         |
| Table S2.....                                                | 10        |
| Table S3.....                                                | 11        |
| Table S4.....                                                | 12        |
| Table S5.....                                                | 26        |
| Table S6.....                                                | 27        |
| Table S7.....                                                | 28        |
| <b>Supplementary Figures</b> .....                           | <b>29</b> |
| Figure S1.....                                               | 29        |
| Figure S2.....                                               | 30        |
| Figure S3.....                                               | 31        |
| Figure S4.....                                               | 32        |
| Figure S5.....                                               | 33        |

## Supplementary Methods

### *Detailed experimental design*

We captured common toad pairs at Silbersee, Vienna, Austria (48°12'33"N, 16°15'48"E) and transported them to the premises of the PNMS/PHS Sacré Coeur in Pressbaum, Austria (48°11'11"N, 16°04'48"E) where we allowed pairs to lay eggs in 45 L plastic boxes and raised their offspring until metamorphosis in 140 L mesocosms (82 × 58 × 30 cm, length × width × height). Mesocosms were set up two weeks before the addition of toad eggs by filling with 130 L of aged tap-water, adding 50 g dried beech leaves, and inoculating with 1 L of pond water (for similar methodology see e.g. <sup>1,2</sup>). The resulting density of 60 tadpoles per 0.13 m<sup>3</sup> water (~460 tadpoles/m<sup>3</sup>) falls well within the range that can be observed in natural ponds in the area (Bókony et al. unpubl. data).

We collected backswimmer imagos (*Notonecta* sp.), 4th instar larvae of the southern hawker (*Aeshna cyanea*) and adult, male smooth newts (*Lissotriton vulgaris*) from private ponds in Lower-Austria, Austria, and we commercially bought juvenile three-spined sticklebacks (*Gasterosteus aculeatus*). In the experiment we fed caged specimens of each predator with one *B. bufo* and one *Rana temporaria* tadpole three times a week. All four species represent naturally occurring predators of *B. bufo*.

After metamorphosis, toadlets were kept at the Konrad Lorenz Institute of Ethology (KLIVV), Vienna, Austria (48°13'16"N, 16°17'06"E). We excluded two families from further stages of the study, because of low numbers of surviving toadlets. Enclosures were located in a forested area of the KLIVV. They measured 3 × 3 m, were 60 cm high and buried 20 cm into the ground. The walls were made of 80 cm wide mosquito screen fixed on a wooden frame, with a 10 cm wide mosquito net strip fixed on top. This allowed prey items and aerial predators entering from above, but kept toadlets inside and terrestrial competitors and predators outside. Enclosures contained two shallow plastic dishes filled with water and

varying density of natural vegetation. We supplemented naturally arriving prey by adding a mixture of the arthropods also used as food immediately after metamorphosis (see in the main text) and later also mealworms (larval *Tenebrio molitor*) two times a week. Due to fissures on the wall of three enclosures and grass snakes (*Natrix natrix*) entering a fourth enclosure, recapture rates at the end of the growing season turned out to be very low in four enclosures (8-34 %), leaving us with toadlets from 12 enclosures to be used in the subsequent hibernation experiment.

We minimized handling of toadlets throughout hibernation to maintain stable temperatures in the refrigerators and to reduce handling stress, thus the tubes of toads were only moistened and relocated during hibernation, but no data regarding survival or body mass was taken at these regular occasions. Our goal in this study was to estimate survival until the end of hibernation, not to analyze the dynamics of survival during this period, since the number of surviving toadlets that can continue their lives after hibernation is the relevant factor for the long-term persistence of populations. Similarly, a second sampling occasion (3 weeks after the end of hibernation) was introduced to enable the estimation of recovery after overwintering and delayed effects of hibernation conditions, without studying mortality patterns between the two sampling occasions.

After the termination of the experiment we kept toadlets at 12 °C in large boxes, and fed them with commercially bought juvenile crickets and woodlice *ad libitum* until the weather permitted their release at their pond of origin in mid March.

#### *Rationale for selected hibernation temperatures*

In a field study Sinsch <sup>3</sup> registered ambient temperatures between 0.9 and 3.1 °C within hibernation sites of surviving animals, while van Gelder, et al. <sup>4</sup> found that minimum body temperatures of common toads ranged between 0.6 and 3.3 °C. Gittins, et al. <sup>5</sup> and Denton and

Beebee <sup>6</sup> observed a threshold of movement and activity of toads at 4 °C. At the same time, climate change projections predict an increase in winter temperatures by 1-4 °C for Central and Eastern Europe by the end of the century <sup>7</sup>.

## **Supplementary Results**

### *Survival and body mass change after hibernation*

After the post-hibernation identification and weighing of toadlets we kept them in the refrigerator set to 7.5 °C for another two weeks and documented mortality and weighed them again at the end of this period. We calculated body mass change between the two post-hibernation weighing occasion as  $\log_{10}(\text{mass three weeks after hibernation}/\text{mass one week after hibernation})$ . Statistical analysis of these data commenced identically as presented in the *Materials and Methods* section of the main text. Since results obtained from the data collected in this period of the study do not contradict results and conclusions presented in the main text, we mention them briefly only here.

Between the two post-hibernation weighing occasions 28 toadlets died (Fig. S2). During our analysis we found that survival in this period was affected by the three-way interaction of hibernation temperature, hibernation length and body mass before hibernation (Table S6). However, this interaction was due to three toadlets in the 4.5 °C, short hibernation scenario that had very large pre-hibernation mass, experienced large mass loss during hibernation, and died after the first weighing (no further toadlets died after hibernation in this scenario; Fig. S3). To ensure that our conclusions are not biased by a few outliers, we reduced this model by excluding the three-way interaction and both two-way interactions of mass before hibernation (with temperature during hibernation and hibernation length, respectively). After reducing the model, we found that survival in this period was higher when winter was milder (Table S7, Fig. S2), and tended to be higher when winter was shorter (Wald  $\chi^2_1 = 2.76$ ,

$P = 0.097$ ), whereas the interaction between hibernation temperature and hibernation length was not significant (Wald  $\chi^2_1 = 0.29$ ,  $P = 0.592$ ) (Table S7, Fig. S2).

Body mass change after hibernation in the remaining 297 specimens was significantly affected by hibernation length, hibernation temperature and their interaction (Table S7). Toadlets experiencing a shorter hibernation period gained mass after hibernation, whereas those overwintering for longer lost mass (Fig. S4); mass gain was larger after a short mild winter than after a short cold winter while there was no effect of hibernation temperature when the winter was long (Fig. S4).

#### *Effects of the larval environment*

Individuals that had developed in the presence of *A. cyanea* as tadpoles had a higher survival rate during hibernation than control tadpoles that had developed in the absence of predators (95.1 % and 83.6 % survived, respectively; Table S1 and Fig. S1). We also found a marginally non-significant effect of larval environment (Wald  $\chi^2_1 = 9.36$ ,  $P = 0.053$ ) on body mass change after hibernation, where toads that had developed in the presence of *A. cyanea* as tadpoles showed higher mass gain compared to controls (mass change as means  $\pm$  S.E., toads reared with *A. cyanea*:  $128 \pm 27.15$  mg,  $N = 68$ ; controls:  $70 \pm 25.53$  mg,  $N = 57$ ; Table S7 and Fig. S5).

#### **Supplementary Discussion**

Body mass gain of toadlets between the two weighing occasions after hibernation could have resulted from physiological changes as an adjustment to spring conditions, such as restoration of the water balance by water uptake from the environment. At the same time, lower temperatures may have impeded physiological reactions to the onset of spring in toadlets hibernating at 1.5 °C for 61 days compared to toadlets overwintering at 4.5 °C for the same

length, resulting in less mass gained. Short bouts of freezing temperatures are known to prolong recovery and seriously reduce performance of anurans after hibernation<sup>8,9</sup>. It is possible that long exposure to relatively low temperatures, as in our study, acts similarly, but this hypothesis remains to be tested.

Presence of *A. cyanea* larvae during the tadpole stage enhanced survival of toadlets during hibernation, and tended to increase post-hibernation mass gain compared to control individuals. This supports the conclusion of Garner, et al.<sup>10</sup>, that survival during winter can be affected by larval traits. Altwegg and Reyer<sup>11</sup> and Relyea<sup>12</sup> also reported that timing of, and size at metamorphosis, which are known to be influenced by cues on predation threat, can have long lasting effects on morphology and survival of anuran amphibians.

### Supplementary References

- 1 Hettyey, A., Vincze, K., Zsarnóczai, S., Hoi, H. & Laurila, A. Costs and benefits of defences induced by predators differing in dangerousness. *J. Evol. Biol.* **24**, 1007-1019 (2011).
- 2 Van Buskirk, J. Incipient habitat race formation in an amphibian. *J. Evol. Biol.* **27**, 585-592 (2014).
- 3 Sinsch, U. Seasonal changes in the migratory behaviour of the toad *Bufo bufo*: direction and magnitude of movements. *Oecologia* **76**, 390-398 (1988).
- 4 van Gelder, J. J., Olders, J. H. J., Bosch, J. W. G. & Starmans, P. W. Behaviour and body temperature of hibernating common toads *Bufo bufo*. *Holarctic Ecol.* **9**, 225-228 (1986).
- 5 Gittins, S. P., Parker, A. G. & Slater, F. M. Population characteristics of the common toad (*Bufo bufo*) visiting an breeding site in mid-Wales. *J. Anim. Ecol.* **49**, 161-173 (1980).
- 6 Denton, J. S. & Beebee, T. J. C. Summer and winter refugia of natterjacks (*Bufo calamita*) and common toads (*Bufo bufo*) in Britain. *Herpetol. J.* **3**, 90-94 (1993).
- 7 IPCC. *Climate Change 2013: The Physical Science Basis. Contribution of Working Group I to the Fifth Assessment Report of the Intergovernmental Panel on Climate*

- Change*. (Cambridge University Press, Cambridge, United Kingdom and New York, NY, USA, 2013).
- 8 Costanzo, J., P., Irwin, J., T. & Lee, R. E., Jr. Freezing impairment of male reproductive behaviors of the freeze-tolerant wood frog, *Rana sylvatica*. *Physiol. Zool.* **70**, 158-166 (1997).
  - 9 Voituron, Y. & Lengagne, T. Freezing before mating severely affects the fitness of a capital breeder. *Physiol. Biochem. Zool.* **81**, 204-210 (2008).
  - 10 Garner, T. W. J., Rowcliffe, J. M. & Fisher, M. C. Climate change, chytridiomycosis or condition: an experimental test of amphibian survival. *Glob. Change Biol.* **17**, 667-675 (2011).
  - 11 Altwegg, R. & Reyer, H.-U. Patterns of natural selection on size at metamorphosis in water frogs. *Evolution* **57**, 872-882 (2003).
  - 12 Relyea, R. A. The lasting effects of adaptive plasticity: predator-induced tadpoles become long-legged frogs. *Ecology* **82**, 1947-1955 (2001).



**Table S1.** Effects of larval environment (in bold) on the survival of toadlets during hibernation (N=371). Generalized linear mixed-effects model fit by maximum likelihood (Laplace Approximation) using the 'summary' function in the 'lme4' package in R. Intercept refers to control toadlets (reared without predators as tadpoles) hibernating at 1.5 °C for 61 days.

|                                      | Estimate | s.e.m. | z      | P      |
|--------------------------------------|----------|--------|--------|--------|
| intercept                            | -21.2290 | 5.0726 | -4.185 | <0.001 |
| hibernation temperature (4.5 °C)     | 2.6130   | 0.5276 | 4.952  | <0.001 |
| hibernation length (91 days)         | -2.4364  | 0.5016 | -4.857 | <0.001 |
| <b><i>Notonecta</i> sp.</b>          | 0.9320   | 0.6708 | 1.389  | 0.165  |
| <b><i>Aeshna cyanea</i></b>          | 1.8990   | 0.7383 | 2.572  | 0.01   |
| <b><i>Gasterosteus aculeatus</i></b> | -0.2674  | 0.5662 | -0.472 | 0.637  |
| <b><i>Lissotriton vulgaris</i></b>   | 0.4597   | 0.5836 | 0.788  | 0.431  |
| mass before hibernation              | 7.7514   | 1.6789 | 4.617  | <0.001 |

**Table S2.** Non-significant main effects and interactions in analyses including survival and body mass after hibernation. Each effect was calculated by including that effect into the final models shown in Table 1. Results were obtained from type III analysis-of-deviance tables with Wald  $\chi^2$  tests using the car package in R. In case of survival, interactions with larval environment could not be estimated because in some subgroups there was no variance (all individuals survived or died), but corresponding graphs did not suggest the presence of significant interactions between larval environment and the other explanatory variables. Graphs are available from the authors upon request.

|                                                                                      | N   | $\chi^2$ | Df | P     |
|--------------------------------------------------------------------------------------|-----|----------|----|-------|
| <u>Survival during hibernation</u>                                                   | 371 |          |    |       |
| hibernation length $\times$ hibernation temperature                                  |     | 0.03     | 1  | 0.868 |
| hibernation length $\times$ mass before hibernation                                  |     | 0.43     | 1  | 0.514 |
| hibernation temperature $\times$ mass before hibernation                             |     | 0.61     | 1  | 0.436 |
| <u>Body mass after hibernation</u>                                                   | 325 |          |    |       |
| larval environment                                                                   |     | 2.48     | 4  | 0.648 |
| hibernation length $\times$ larval environment                                       |     | 5.19     | 4  | 0.268 |
| hibernation length $\times$ mass before hibernation                                  |     | 2.11     | 1  | 0.147 |
| hibernation temperature $\times$ larval environment                                  |     | 4.05     | 4  | 0.399 |
| hibernation temperature $\times$ mass before hibernation                             |     | 0.59     | 1  | 0.441 |
| larval environment $\times$ mass before hibernation                                  |     | 3.28     | 4  | 0.512 |
| hibernation length $\times$ hibernation temperature $\times$ mass before hibernation |     | 2.67     | 1  | 0.102 |
| hibernation length $\times$ larval environment $\times$ mass before hibernation      |     | 4.98     | 4  | 0.289 |
| hibernation temperature $\times$ larval environment $\times$ mass before hibernation |     | 2.03     | 4  | 0.730 |
| larval environment $\times$ hibernation length $\times$ hibernation temperature      |     | 0.85     | 4  | 0.932 |

**Table S3.** Effect of toe clipping on survival of toadlets during and after hibernation. Number of toes clipped had no significant effect on survival either during (Wald  $\chi^2_2 = 2.09$ ,  $P = 0.352$ ) or after hibernation (Wald  $\chi^2_2 = 4.58$ ,  $P = 0.101$ ).

| Number of toes clipped | During hibernation |           |            | After hibernation |           |            |
|------------------------|--------------------|-----------|------------|-------------------|-----------|------------|
|                        | N                  | Survivors | % survived | N                 | Survivors | % survived |
| 1                      | 76                 | 65        | 85.53      | 65                | 61        | 93.85      |
| 2                      | 270                | 236       | 87.41      | 236               | 217       | 91.95      |
| 3                      | 25                 | 24        | 96         | 24                | 19        | 79.17      |

**Table S4.** Family, larval environment, enclosure, and mass before hibernation of common toad (*Bufo bufo*) toadlets used in the hibernation experiment. Specimen 378 was discarded from the analysis, due to missing data.

| ID number | Family | Larval environment            | Enclosure | Mass before hibernation (mg) | Hibernation length | Hibernation temperature | Survived 1 week after hibernation | Survived 3 weeks after hibernation | 1st mass after hibernation | 2nd mass after hibernation |
|-----------|--------|-------------------------------|-----------|------------------------------|--------------------|-------------------------|-----------------------------------|------------------------------------|----------------------------|----------------------------|
| 1         | 8      | <i>Aeshna cyanea</i>          | 1         | 1551                         | 61 days            | 1.5 °C                  | Yes                               | Yes                                | 1480                       | 1665                       |
| 2         | 8      | <i>Lissotriton vulgaris</i>   | 1         | 1359                         | 91 days            | 4.5 °C                  | Yes                               | Yes                                | 1365                       | 1338                       |
| 3         | 3      | <i>Notonecta</i> sp.          | 1         | 1391                         | 61 days            | 4.5 °C                  | Yes                               | Yes                                | 1273                       | 1402                       |
| 4         | 9      | <i>Notonecta</i> sp.          | 1         | 2693                         | 61 days            | 1.5 °C                  | Yes                               | Yes                                | 1897                       | 2280                       |
| 5         | 2      | <i>Aeshna cyanea</i>          | 1         | 1363                         | 91 days            | 4.5 °C                  | Yes                               | Yes                                | 1329                       | 1590                       |
| 6         | 4      | <i>Aeshna cyanea</i>          | 1         | 1126                         | 61 days            | 4.5 °C                  | Yes                               | Yes                                | 978                        | 1073                       |
| 7         | 5      | <i>Gasterosteus aculeatus</i> | 1         | 1479                         | 91 days            | 4.5 °C                  | Yes                               | Yes                                | 1030                       | 948                        |
| 8         | 1      | <i>Gasterosteus aculeatus</i> | 1         | 2234                         | 61 days            | 1.5 °C                  | Yes                               | Yes                                | 2140                       | 2178                       |
| 9         | 3      | <i>Aeshna cyanea</i>          | 1         | 1303                         | 91 days            | 1.5 °C                  | Yes                               | Yes                                | 1241                       | 1322                       |
| 10        | 10     | <i>Aeshna cyanea</i>          | 1         | 2436                         | 91 days            | 1.5 °C                  | Yes                               | Yes                                | 1496                       | 1635                       |
| 11        | 9      | <i>Gasterosteus aculeatus</i> | 1         | 2124                         | 61 days            | 4.5 °C                  | Yes                               | Yes                                | 2117                       | 2376                       |
| 12        | 1      | control                       | 1         | 1893                         | 91 days            | 4.5 °C                  | Yes                               | Yes                                | 1656                       | 1346                       |
| 13        | 8      | control                       | 1         | 1226                         | 91 days            | 4.5 °C                  | Yes                               | Yes                                | 1312                       | 762                        |
| 14        | 8      | <i>Gasterosteus aculeatus</i> | 1         | 1160                         | 61 days            | 4.5 °C                  | Yes                               | Yes                                | 869                        | 917                        |
| 15        | 10     | <i>Gasterosteus aculeatus</i> | 1         | 2051                         | 61 days            | 1.5 °C                  | Yes                               | Yes                                | 1554                       | 1939                       |
| 16        | 5      | <i>Aeshna cyanea</i>          | 1         | 1390                         | 61 days            | 1.5 °C                  | Yes                               | No                                 | 782                        | NA                         |
| 17        | 7      | <i>Aeshna cyanea</i>          | 1         | 1226                         | 91 days            | 4.5 °C                  | Yes                               | Yes                                | 1143                       | 1084                       |
| 18        | 1      | <i>Lissotriton vulgaris</i>   | 1         | 1793                         | 61 days            | 1.5 °C                  | Yes                               | Yes                                | 1387                       | 1625                       |
| 19        | 3      | <i>Gasterosteus aculeatus</i> | 1         | 1396                         | 91 days            | 1.5 °C                  | Yes                               | Yes                                | 1070                       | 889                        |
| 20        | 6      | <i>Lissotriton vulgaris</i>   | 1         | 2052                         | 61 days            | 4.5 °C                  | Yes                               | No                                 | 1325                       | NA                         |
| 21        | 4      | <i>Lissotriton vulgaris</i>   | 1         | 1394                         | 61 days            | 4.5 °C                  | Yes                               | Yes                                | 1054                       | 1247                       |

|    |    |                               |   |      |         |        |     |     |      |    |      |
|----|----|-------------------------------|---|------|---------|--------|-----|-----|------|----|------|
| 22 | 9  | <i>Lissotriton vulgaris</i>   | 1 | 1728 | 91 days | 4.5 °C | Yes | No  | 1245 | NA |      |
| 23 | 3  | <i>Lissotriton vulgaris</i>   | 1 | 1227 | 61 days | 4.5 °C | Yes | Yes | 1064 |    | 1139 |
| 24 | 10 | <i>Lissotriton vulgaris</i>   | 1 | 1795 | 61 days | 1.5 °C | Yes | Yes | 1658 |    | 1674 |
| 25 | 9  | <i>Aeshna cyanea</i>          | 1 | 2215 | 61 days | 1.5 °C | Yes | Yes | 1425 |    | 1294 |
| 26 | 3  | control                       | 1 | 1420 | 91 days | 4.5 °C | Yes | No  | 1243 | NA |      |
| 27 | 2  | <i>Lissotriton vulgaris</i>   | 1 | 1395 | 91 days | 4.5 °C | Yes | Yes | 1105 |    | 836  |
| 28 | 7  | <i>Gasterosteus aculeatus</i> | 1 | 1555 | 61 days | 4.5 °C | Yes | Yes | 1473 |    | 1467 |
| 29 | 10 | control                       | 1 | 2582 | 91 days | 1.5 °C | Yes | Yes | 1821 |    | 1763 |
| 30 | 5  | <i>Notonecta</i> sp.          | 1 | 1112 | 61 days | 4.5 °C | Yes | Yes | 918  |    | 895  |
| 31 | 5  | <i>Lissotriton vulgaris</i>   | 1 | 1398 | 61 days | 4.5 °C | Yes | Yes | 1117 |    | 1340 |
| 32 | 7  | <i>Lissotriton vulgaris</i>   | 1 | 1156 | 61 days | 1.5 °C | Yes | Yes | 1191 |    | 1138 |
| 33 | 10 | <i>Notonecta</i> sp.          | 1 | 3200 | 61 days | 4.5 °C | Yes | Yes | 2580 |    | 2771 |
| 34 | 7  | control                       | 1 | 1462 | 91 days | 1.5 °C | No  | NA  | NA   | NA |      |
| 35 | 5  | <i>Aeshna cyanea</i>          | 2 | 2295 | 61 days | 4.5 °C | Yes | Yes | 1903 |    | 2574 |
| 36 | 10 | <i>Notonecta</i> sp.          | 2 | 4245 | 91 days | 4.5 °C | Yes | Yes | 3917 |    | 3608 |
| 37 | 1  | <i>Aeshna cyanea</i>          | 2 | 1793 | 91 days | 1.5 °C | Yes | Yes | 1498 |    | 1458 |
| 38 | 9  | <i>Gasterosteus aculeatus</i> | 2 | 2793 | 91 days | 4.5 °C | Yes | Yes | 2469 |    | 2494 |
| 39 | 4  | <i>Lissotriton vulgaris</i>   | 2 | 1196 | 91 days | 4.5 °C | Yes | Yes | 1007 |    | 1033 |
| 40 | 7  | control                       | 2 | 1634 | 91 days | 4.5 °C | Yes | Yes | 1252 |    | 1083 |
| 41 | 8  | <i>Gasterosteus aculeatus</i> | 2 | 3470 | 91 days | 1.5 °C | Yes | Yes | 2597 |    | 2550 |
| 42 | 4  | <i>Aeshna cyanea</i>          | 2 | 1813 | 61 days | 4.5 °C | Yes | Yes | 1656 |    | 1775 |
| 43 | 6  | <i>Lissotriton vulgaris</i>   | 2 | 1688 | 91 days | 4.5 °C | Yes | Yes | 1318 |    | 1259 |
| 44 | 8  | <i>Lissotriton vulgaris</i>   | 2 | 2168 | 91 days | 4.5 °C | Yes | Yes | 1668 |    | 1474 |
| 45 | 9  | <i>Aeshna cyanea</i>          | 2 | 1776 | 91 days | 1.5 °C | Yes | Yes | 1893 |    | 1888 |
| 46 | 6  | <i>Notonecta</i> sp.          | 2 | 1956 | 61 days | 4.5 °C | Yes | No  | 1115 | NA |      |
| 47 | 7  | <i>Lissotriton vulgaris</i>   | 2 | 2198 | 61 days | 1.5 °C | Yes | No  | 1280 | NA |      |
| 48 | 2  | control                       | 2 | 2041 | 61 days | 1.5 °C | Yes | Yes | 1736 |    | 1925 |
| 49 | 3  | control                       | 2 | 1334 | 61 days | 1.5 °C | Yes | Yes | 1027 |    | 1170 |

|    |    |                               |   |      |         |        |     |     |      |      |
|----|----|-------------------------------|---|------|---------|--------|-----|-----|------|------|
| 50 | 4  | <i>Gasterosteus aculeatus</i> | 2 | 1504 | 61 days | 1.5 °C | Yes | Yes | 962  | 1187 |
| 52 | 9  | <i>Notonecta</i> sp.          | 2 | 2009 | 61 days | 4.5 °C | Yes | Yes | 1899 | 1777 |
| 53 | 10 | <i>Aeshna cyanea</i>          | 2 | 2557 | 91 days | 4.5 °C | Yes | Yes | 2266 | 2018 |
| 54 | 6  | <i>Gasterosteus aculeatus</i> | 2 | 1485 | 61 days | 1.5 °C | Yes | Yes | 1267 | 1363 |
| 55 | 6  | control                       | 2 | 1183 | 61 days | 1.5 °C | Yes | Yes | 1049 | 1171 |
| 56 | 3  | <i>Gasterosteus aculeatus</i> | 2 | 1555 | 91 days | 1.5 °C | No  | NA  | NA   | NA   |
| 57 | 4  | control                       | 2 | 2418 | 61 days | 1.5 °C | Yes | Yes | 2228 | 2283 |
| 58 | 10 | <i>Gasterosteus aculeatus</i> | 2 | 3221 | 61 days | 4.5 °C | Yes | Yes | 2484 | 2447 |
| 59 | 5  | control                       | 2 | 1481 | 91 days | 1.5 °C | No  | NA  | NA   | NA   |
| 71 | 5  | <i>Lissotriton vulgaris</i>   | 3 | 1255 | 61 days | 1.5 °C | Yes | Yes | 1122 | 1227 |
| 72 | 5  | <i>Gasterosteus aculeatus</i> | 3 | 1505 | 61 days | 4.5 °C | Yes | Yes | 1384 | 1356 |
| 73 | 4  | <i>Lissotriton vulgaris</i>   | 3 | 1211 | 61 days | 1.5 °C | Yes | Yes | 1263 | 1288 |
| 74 | 9  | <i>Lissotriton vulgaris</i>   | 3 | 1509 | 91 days | 4.5 °C | Yes | Yes | 1474 | 1573 |
| 75 | 1  | control                       | 3 | 1660 | 61 days | 4.5 °C | Yes | Yes | 1719 | 1750 |
| 76 | 6  | <i>Aeshna cyanea</i>          | 3 | 1341 | 61 days | 1.5 °C | Yes | Yes | 1221 | 1233 |
| 77 | 6  | <i>Notonecta</i> sp.          | 3 | 1329 | 61 days | 1.5 °C | Yes | Yes | 1144 | 1363 |
| 78 | 3  | <i>Aeshna cyanea</i>          | 3 | 971  | 61 days | 1.5 °C | Yes | Yes | 824  | 1041 |
| 79 | 2  | <i>Gasterosteus aculeatus</i> | 3 | 1576 | 91 days | 1.5 °C | Yes | Yes | 1256 | 1251 |
| 80 | 8  | <i>Notonecta</i> sp.          | 3 | 1123 | 91 days | 1.5 °C | Yes | Yes | 778  | 703  |
| 81 | 1  | <i>Notonecta</i> sp.          | 3 | 1513 | 61 days | 4.5 °C | Yes | Yes | 1308 | 1278 |
| 82 | 10 | <i>Gasterosteus aculeatus</i> | 3 | 2214 | 91 days | 1.5 °C | Yes | Yes | 1580 | 1448 |
| 83 | 4  | <i>Gasterosteus aculeatus</i> | 3 | 1282 | 91 days | 4.5 °C | Yes | Yes | 1306 | 1141 |
| 84 | 5  | <i>Notonecta</i> sp.          | 3 | 1345 | 91 days | 4.5 °C | Yes | Yes | 1152 | 1031 |
| 85 | 2  | <i>Notonecta</i> sp.          | 3 | 1243 | 91 days | 1.5 °C | Yes | Yes | 1083 | 1262 |
| 86 | 10 | control                       | 3 | 1255 | 91 days | 4.5 °C | No  | NA  | NA   | NA   |
| 87 | 2  | <i>Aeshna cyanea</i>          | 3 | 1433 | 61 days | 4.5 °C | Yes | Yes | 1168 | 1319 |
| 88 | 3  | <i>Gasterosteus aculeatus</i> | 3 | 1220 | 61 days | 4.5 °C | Yes | Yes | 1100 | 1339 |
| 89 | 1  | <i>Aeshna cyanea</i>          | 3 | 1545 | 91 days | 4.5 °C | Yes | Yes | 1300 | 1366 |

|     |    |                               |   |      |         |        |     |    |     |      |      |
|-----|----|-------------------------------|---|------|---------|--------|-----|----|-----|------|------|
| 90  | 2  | <i>Lissotriton vulgaris</i>   | 3 | 1508 | 91 days | 1.5 °C | Yes |    | Yes | 1177 | 1201 |
| 91  | 6  | <i>Lissotriton vulgaris</i>   | 3 | 1218 | 91 days | 1.5 °C | No  | NA |     | NA   | NA   |
| 92  | 9  | <i>Notonecta</i> sp.          | 3 | 2174 | 91 days | 4.5 °C | Yes |    | Yes | 1858 | 1469 |
| 93  | 4  | <i>Aeshna cyanea</i>          | 3 | 1543 | 91 days | 1.5 °C | Yes |    | No  | 888  | NA   |
| 94  | 7  | <i>Gasterosteus aculeatus</i> | 3 | 1917 | 61 days | 1.5 °C | Yes |    | Yes | 1803 | 1842 |
| 95  | 4  | control                       | 3 | 1004 | 91 days | 1.5 °C | Yes |    | No  | 653  | NA   |
| 96  | 9  | <i>Gasterosteus aculeatus</i> | 3 | 2478 | 91 days | 4.5 °C | Yes |    | Yes | 2331 | 2255 |
| 97  | 10 | <i>Notonecta</i> sp.          | 3 | 902  | 91 days | 4.5 °C | Yes |    | Yes | 830  | 811  |
| 98  | 8  | <i>Gasterosteus aculeatus</i> | 3 | 1099 | 91 days | 1.5 °C | No  | NA |     | NA   | NA   |
| 99  | 6  | control                       | 3 | 1240 | 91 days | 1.5 °C | No  | NA |     | NA   | NA   |
| 100 | 4  | <i>Notonecta</i> sp.          | 3 | 1265 | 91 days | 4.5 °C | Yes |    | Yes | 1319 | 1339 |
| 101 | 10 | <i>Lissotriton vulgaris</i>   | 3 | 1825 | 91 days | 1.5 °C | Yes |    | Yes | 1437 | 1246 |
| 102 | 2  | control                       | 3 | 1264 | 91 days | 1.5 °C | Yes |    | Yes | 1072 | 1053 |
| 103 | 7  | <i>Aeshna cyanea</i>          | 3 | 1364 | 61 days | 4.5 °C | Yes |    | Yes | 1035 | 1371 |
| 104 | 8  | <i>Aeshna cyanea</i>          | 3 | 1002 | 61 days | 1.5 °C | Yes |    | Yes | 842  | 925  |
| 105 | 3  | control                       | 3 | 796  | 61 days | 4.5 °C | Yes |    | Yes | 731  | 865  |
| 106 | 5  | <i>Aeshna cyanea</i>          | 3 | 1126 | 61 days | 4.5 °C | Yes |    | Yes | 1062 | 1121 |
| 107 | 10 | <i>Notonecta</i> sp.          | 4 | 3089 | 61 days | 1.5 °C | Yes |    | Yes | 2515 | 2465 |
| 108 | 1  | <i>Gasterosteus aculeatus</i> | 4 | 1909 | 91 days | 4.5 °C | Yes |    | Yes | 1782 | 1698 |
| 109 | 1  | control                       | 4 | 1146 | 61 days | 4.5 °C | Yes |    | Yes | 1167 | 1341 |
| 110 | 4  | <i>Notonecta</i> sp.          | 4 | 1117 | 61 days | 1.5 °C | Yes |    | Yes | 1045 | 1083 |
| 111 | 3  | <i>Aeshna cyanea</i>          | 4 | 959  | 91 days | 1.5 °C | No  | NA |     | NA   | NA   |
| 112 | 8  | <i>Notonecta</i> sp.          | 4 | 1573 | 91 days | 4.5 °C | Yes |    | Yes | 1217 | 1079 |
| 113 | 2  | <i>Gasterosteus aculeatus</i> | 4 | 2130 | 61 days | 1.5 °C | Yes |    | Yes | 2067 | 2109 |
| 114 | 3  | <i>Gasterosteus aculeatus</i> | 4 | 1112 | 91 days | 4.5 °C | Yes |    | Yes | 754  | 666  |
| 115 | 9  | control                       | 4 | 2950 | 91 days | 1.5 °C | Yes |    | Yes | 2042 | 1942 |
| 116 | 2  | control                       | 4 | 948  | 91 days | 4.5 °C | Yes |    | Yes | 669  | 553  |
| 117 | 9  | <i>Aeshna cyanea</i>          | 4 | 1097 | 61 days | 4.5 °C | Yes |    | Yes | 1006 | 1310 |

|     |    |                               |   |      |         |        |     |     |      |      |
|-----|----|-------------------------------|---|------|---------|--------|-----|-----|------|------|
| 118 | 5  | <i>Aeshna cyanea</i>          | 4 | 1142 | 91 days | 1.5 °C | Yes | Yes | 956  | 1071 |
| 119 | 4  | <i>Aeshna cyanea</i>          | 4 | 831  | 61 days | 4.5 °C | Yes | Yes | 839  | 933  |
| 120 | 8  | <i>Gasterosteus aculeatus</i> | 4 | 1399 | 91 days | 4.5 °C | Yes | Yes | 1127 | 1200 |
| 121 | 7  | <i>Gasterosteus aculeatus</i> | 4 | 1193 | 91 days | 1.5 °C | No  | NA  | NA   | NA   |
| 122 | 5  | control                       | 4 | 870  | 91 days | 1.5 °C | No  | NA  | NA   | NA   |
| 123 | 4  | control                       | 4 | 1086 | 91 days | 4.5 °C | Yes | Yes | 808  | 775  |
| 124 | 10 | <i>Aeshna cyanea</i>          | 4 | 1230 | 61 days | 1.5 °C | Yes | Yes | 1151 | 1365 |
| 125 | 2  | <i>Aeshna cyanea</i>          | 4 | 1095 | 91 days | 4.5 °C | Yes | Yes | 1121 | 1188 |
| 126 | 7  | <i>Lissotriton vulgaris</i>   | 4 | 1131 | 91 days | 1.5 °C | Yes | Yes | 708  | 670  |
| 127 | 5  | <i>Notonecta</i> sp.          | 4 | 927  | 61 days | 1.5 °C | Yes | Yes | 918  | 942  |
| 128 | 8  | <i>Aeshna cyanea</i>          | 4 | 980  | 91 days | 4.5 °C | Yes | Yes | 872  | 901  |
| 129 | 7  | <i>Aeshna cyanea</i>          | 4 | 1046 | 61 days | 1.5 °C | Yes | Yes | 957  | 1061 |
| 130 | 5  | <i>Lissotriton vulgaris</i>   | 4 | 1167 | 61 days | 4.5 °C | Yes | Yes | 1017 | 1400 |
| 131 | 6  | <i>Gasterosteus aculeatus</i> | 4 | 1340 | 91 days | 4.5 °C | Yes | Yes | 1091 | 1079 |
| 132 | 9  | <i>Notonecta</i> sp.          | 4 | 1253 | 91 days | 1.5 °C | Yes | Yes | 1052 | 1121 |
| 133 | 2  | <i>Notonecta</i> sp.          | 4 | 1251 | 91 days | 4.5 °C | Yes | Yes | 1126 | 1264 |
| 134 | 1  | <i>Aeshna cyanea</i>          | 4 | 1456 | 91 days | 1.5 °C | Yes | Yes | 1122 | 1042 |
| 135 | 6  | <i>Notonecta</i> sp.          | 4 | 1363 | 61 days | 4.5 °C | Yes | Yes | 1230 | 1463 |
| 137 | 6  | <i>Lissotriton vulgaris</i>   | 4 | 1218 | 91 days | 1.5 °C | Yes | Yes | 939  | 1476 |
| 138 | 5  | <i>Aeshna cyanea</i>          | 5 | 1482 | 91 days | 4.5 °C | Yes | Yes | 862  | 1200 |
| 139 | 8  | <i>Gasterosteus aculeatus</i> | 5 | 1196 | 61 days | 1.5 °C | Yes | Yes | 1117 | 1278 |
| 140 | 10 | control                       | 5 | 1529 | 61 days | 1.5 °C | Yes | Yes | 1229 | 1489 |
| 141 | 4  | control                       | 5 | 1405 | 61 days | 4.5 °C | Yes | Yes | 1155 | 1577 |
| 142 | 9  | <i>Gasterosteus aculeatus</i> | 5 | 1715 | 91 days | 1.5 °C | No  | NA  | NA   | NA   |
| 143 | 7  | control                       | 5 | 2089 | 61 days | 1.5 °C | Yes | Yes | 1867 | 2110 |
| 144 | 3  | <i>Gasterosteus aculeatus</i> | 5 | 1691 | 61 days | 1.5 °C | Yes | Yes | 1584 | 1714 |
| 145 | 2  | <i>Notonecta</i> sp.          | 5 | 1419 | 91 days | 1.5 °C | Yes | Yes | 974  | 1079 |
| 146 | 10 | <i>Lissotriton vulgaris</i>   | 5 | 1310 | 91 days | 1.5 °C | No  | NA  | NA   | NA   |



|     |    |                               |   |      |         |        |     |     |      |      |
|-----|----|-------------------------------|---|------|---------|--------|-----|-----|------|------|
| 147 | 2  | <i>Gasterosteus aculeatus</i> | 5 | 1745 | 61 days | 4.5 °C | Yes | Yes | 1724 | 1864 |
| 148 | 1  | <i>Notonecta</i> sp.          | 5 | 1389 | 91 days | 1.5 °C | Yes | Yes | 1091 | 1175 |
| 149 | 2  | <i>Aeshna cyanea</i>          | 5 | 1444 | 91 days | 1.5 °C | Yes | Yes | 1278 | 1301 |
| 150 | 10 | <i>Gasterosteus aculeatus</i> | 5 | 1432 | 61 days | 4.5 °C | Yes | Yes | 1136 | 1660 |
| 151 | 1  | <i>Gasterosteus aculeatus</i> | 5 | 1331 | 91 days | 1.5 °C | Yes | Yes | 832  | 870  |
| 152 | 9  | <i>Lissotriton vulgaris</i>   | 5 | 1689 | 91 days | 1.5 °C | Yes | Yes | 984  | 944  |
| 153 | 4  | <i>Aeshna cyanea</i>          | 5 | 1884 | 91 days | 1.5 °C | Yes | No  | 1095 | NA   |
| 154 | 10 | <i>Aeshna cyanea</i>          | 5 | 1864 | 61 days | 4.5 °C | Yes | Yes | 1662 | 2526 |
| 155 | 2  | control                       | 5 | 1620 | 61 days | 4.5 °C | Yes | Yes | 1479 | 1815 |
| 156 | 6  | <i>Gasterosteus aculeatus</i> | 5 | 1403 | 91 days | 1.5 °C | No  | NA  | NA   | NA   |
| 157 | 8  | <i>Aeshna cyanea</i>          | 5 | 1396 | 91 days | 4.5 °C | Yes | Yes | 1441 | 1219 |
| 158 | 6  | control                       | 6 | 795  | 91 days | 4.5 °C | No  | NA  | NA   | NA   |
| 159 | 5  | <i>Notonecta</i> sp.          | 6 | 1022 | 61 days | 4.5 °C | Yes | Yes | 865  | 1107 |
| 160 | 5  | <i>Lissotriton vulgaris</i>   | 6 | 813  | 61 days | 4.5 °C | Yes | Yes | 668  | 1031 |
| 161 | 2  | control                       | 6 | 628  | 61 days | 4.5 °C | Yes | Yes | 567  | 693  |
| 162 | 10 | <i>Lissotriton vulgaris</i>   | 6 | 1771 | 91 days | 1.5 °C | No  | NA  | NA   | NA   |
| 163 | 7  | <i>Gasterosteus aculeatus</i> | 6 | 967  | 91 days | 1.5 °C | No  | NA  | NA   | NA   |
| 164 | 3  | <i>Gasterosteus aculeatus</i> | 6 | 1299 | 61 days | 1.5 °C | No  | NA  | NA   | NA   |
| 165 | 9  | <i>Notonecta</i> sp.          | 6 | 1055 | 61 days | 1.5 °C | No  | NA  | NA   | NA   |
| 166 | 10 | <i>Gasterosteus aculeatus</i> | 6 | 1228 | 61 days | 4.5 °C | Yes | Yes | 962  | 1098 |
| 167 | 10 | <i>Aeshna cyanea</i>          | 6 | 1532 | 61 days | 4.5 °C | Yes | Yes | 1012 | 1240 |
| 168 | 7  | <i>Aeshna cyanea</i>          | 6 | 1133 | 61 days | 4.5 °C | Yes | Yes | 1051 | 1208 |
| 169 | 4  | control                       | 6 | 2208 | 91 days | 4.5 °C | Yes | Yes | 1847 | 1656 |
| 170 | 6  | <i>Notonecta</i> sp.          | 6 | 1277 | 91 days | 1.5 °C | Yes | Yes | 984  | 724  |
| 171 | 7  | control                       | 6 | 2420 | 61 days | 4.5 °C | Yes | Yes | 1948 | 2353 |
| 172 | 1  | <i>Gasterosteus aculeatus</i> | 6 | 1189 | 91 days | 1.5 °C | Yes | No  | 725  | NA   |
| 173 | 4  | <i>Notonecta</i> sp.          | 6 | 1091 | 61 days | 4.5 °C | Yes | Yes | 828  | 1141 |
| 174 | 1  | <i>Aeshna cyanea</i>          | 6 | 832  | 61 days | 1.5 °C | Yes | No  | 524  | NA   |

|     |    |                               |   |      |         |        |     |     |      |      |
|-----|----|-------------------------------|---|------|---------|--------|-----|-----|------|------|
| 175 | 5  | <i>Aeshna cyanea</i>          | 6 | 1164 | 61 days | 1.5 °C | Yes | Yes | 886  | 1121 |
| 176 | 9  | <i>Gasterosteus aculeatus</i> | 6 | 1694 | 61 days | 4.5 °C | Yes | Yes | 1447 | 1737 |
| 177 | 2  | <i>Aeshna cyanea</i>          | 6 | 1061 | 91 days | 1.5 °C | Yes | No  | 650  | NA   |
| 178 | 8  | <i>Aeshna cyanea</i>          | 6 | 1177 | 61 days | 4.5 °C | Yes | Yes | 1096 | 1522 |
| 179 | 6  | <i>Gasterosteus aculeatus</i> | 6 | 1038 | 61 days | 1.5 °C | Yes | Yes | 858  | 934  |
| 180 | 9  | control                       | 6 | 2168 | 61 days | 1.5 °C | Yes | Yes | 2014 | 2313 |
| 181 | 10 | <i>Notonecta</i> sp.          | 6 | 1129 | 91 days | 1.5 °C | Yes | Yes | 720  | 712  |
| 182 | 8  | <i>Lissotriton vulgaris</i>   | 6 | 1478 | 61 days | 4.5 °C | Yes | Yes | 1365 | 1548 |
| 183 | 1  | <i>Lissotriton vulgaris</i>   | 6 | 1502 | 61 days | 1.5 °C | Yes | Yes | 1352 | 1499 |
| 184 | 7  | <i>Lissotriton vulgaris</i>   | 6 | 1032 | 61 days | 4.5 °C | Yes | Yes | 908  | 1203 |
| 185 | 9  | <i>Lissotriton vulgaris</i>   | 6 | 1851 | 61 days | 1.5 °C | Yes | Yes | 1696 | 1648 |
| 186 | 9  | <i>Aeshna cyanea</i>          | 6 | 1447 | 61 days | 1.5 °C | Yes | Yes | 1222 | 1343 |
| 187 | 2  | <i>Notonecta</i> sp.          | 6 | 1028 | 61 days | 4.5 °C | Yes | Yes | 846  | 877  |
| 188 | 3  | <i>Lissotriton vulgaris</i>   | 6 | 826  | 91 days | 1.5 °C | No  | NA  | NA   | NA   |
| 189 | 7  | <i>Notonecta</i> sp.          | 6 | 1184 | 91 days | 4.5 °C | Yes | Yes | 907  | 1055 |
| 190 | 2  | <i>Lissotriton vulgaris</i>   | 6 | 974  | 91 days | 1.5 °C | Yes | Yes | 767  | 890  |
| 191 | 8  | <i>Notonecta</i> sp.          | 8 | 1015 | 61 days | 1.5 °C | Yes | No  | 629  | NA   |
| 192 | 6  | <i>Aeshna cyanea</i>          | 8 | 706  | 91 days | 4.5 °C | Yes | No  | 463  | NA   |
| 193 | 8  | <i>Gasterosteus aculeatus</i> | 8 | 1069 | 91 days | 4.5 °C | Yes | Yes | 792  | 686  |
| 194 | 2  | <i>Notonecta</i> sp.          | 8 | 834  | 91 days | 1.5 °C | No  | NA  | NA   | NA   |
| 195 | 3  | <i>Notonecta</i> sp.          | 8 | 683  | 91 days | 1.5 °C | No  | NA  | NA   | NA   |
| 196 | 7  | <i>Gasterosteus aculeatus</i> | 8 | 748  | 91 days | 4.5 °C | Yes | Yes | 552  | 597  |
| 197 | 3  | <i>Aeshna cyanea</i>          | 8 | 640  | 61 days | 4.5 °C | Yes | Yes | 430  | 530  |
| 198 | 9  | <i>Lissotriton vulgaris</i>   | 8 | 634  | 91 days | 4.5 °C | Yes | No  | 378  | NA   |
| 199 | 3  | <i>Lissotriton vulgaris</i>   | 8 | 728  | 61 days | 1.5 °C | No  | NA  | NA   | NA   |
| 200 | 10 | <i>Notonecta</i> sp.          | 8 | 1170 | 61 days | 1.5 °C | Yes | Yes | 1261 | 1383 |
| 201 | 2  | <i>Lissotriton vulgaris</i>   | 8 | 770  | 91 days | 4.5 °C | Yes | Yes | 486  | 505  |
| 202 | 9  | <i>Aeshna cyanea</i>          | 8 | 1270 | 91 days | 4.5 °C | Yes | Yes | 968  | 1106 |

|     |    |                               |   |      |         |        |     |     |      |      |
|-----|----|-------------------------------|---|------|---------|--------|-----|-----|------|------|
| 203 | 10 | <i>Aeshna cyanea</i>          | 8 | 1635 | 61 days | 1.5 °C | Yes | Yes | 1376 | 1713 |
| 204 | 7  | <i>Notonecta</i> sp.          | 8 | 1171 | 61 days | 4.5 °C | Yes | Yes | 988  | 1316 |
| 205 | 1  | <i>Notonecta</i> sp.          | 8 | 1141 | 61 days | 1.5 °C | Yes | Yes | 1054 | 1104 |
| 206 | 8  | <i>Lissotriton vulgaris</i>   | 8 | 902  | 91 days | 1.5 °C | Yes | No  | 525  | NA   |
| 207 | 1  | control                       | 8 | 1520 | 61 days | 1.5 °C | Yes | Yes | 1399 | 1629 |
| 208 | 1  | <i>Gasterosteus aculeatus</i> | 8 | 1182 | 61 days | 4.5 °C | Yes | Yes | 1128 | 1152 |
| 209 | 5  | control                       | 8 | 864  | 61 days | 4.5 °C | Yes | Yes | 694  | 761  |
| 210 | 7  | <i>Aeshna cyanea</i>          | 8 | 883  | 61 days | 4.5 °C | Yes | Yes | 665  | 737  |
| 211 | 7  | <i>Lissotriton vulgaris</i>   | 8 | 988  | 61 days | 1.5 °C | Yes | No  | 591  | NA   |
| 212 | 2  | <i>Gasterosteus aculeatus</i> | 8 | 939  | 91 days | 1.5 °C | Yes | No  | 548  | NA   |
| 213 | 10 | <i>Gasterosteus aculeatus</i> | 8 | 1391 | 91 days | 4.5 °C | Yes | Yes | 1292 | 1212 |
| 214 | 4  | <i>Gasterosteus aculeatus</i> | 8 | 706  | 91 days | 1.5 °C | Yes | Yes | 599  | 481  |
| 215 | 4  | <i>Lissotriton vulgaris</i>   | 8 | 563  | 61 days | 1.5 °C | Yes | No  | 421  | NA   |
| 216 | 6  | <i>Lissotriton vulgaris</i>   | 8 | 793  | 61 days | 1.5 °C | Yes | Yes | 672  | 624  |
| 217 | 7  | control                       | 8 | 996  | 61 days | 1.5 °C | Yes | Yes | 707  | 733  |
| 218 | 8  | <i>Aeshna cyanea</i>          | 8 | 928  | 91 days | 1.5 °C | No  | NA  | NA   | NA   |
| 219 | 9  | control                       | 8 | 801  | 61 days | 1.5 °C | Yes | Yes | 742  | 858  |
| 220 | 5  | <i>Gasterosteus aculeatus</i> | 8 | 1054 | 91 days | 4.5 °C | Yes | No  | 502  | NA   |
| 221 | 4  | control                       | 8 | 811  | 91 days | 4.5 °C | Yes | Yes | 680  | 698  |
| 222 | 2  | control                       | 8 | 1144 | 61 days | 4.5 °C | Yes | Yes | 1126 | 1164 |
| 223 | 5  | <i>Aeshna cyanea</i>          | 8 | 1140 | 91 days | 4.5 °C | Yes | Yes | 894  | 1059 |
| 224 | 10 | <i>Lissotriton vulgaris</i>   | 8 | 1048 | 61 days | 4.5 °C | Yes | Yes | 863  | 1126 |
| 225 | 6  | <i>Gasterosteus aculeatus</i> | 8 | 556  | 91 days | 4.5 °C | No  | NA  | NA   | NA   |
| 226 | 2  | <i>Aeshna cyanea</i>          | 8 | 834  | 61 days | 4.5 °C | Yes | Yes | 649  | 1044 |
| 227 | 1  | <i>Lissotriton vulgaris</i>   | 8 | 1195 | 61 days | 4.5 °C | Yes | Yes | 1050 | 1266 |
| 228 | 5  | <i>Lissotriton vulgaris</i>   | 8 | 754  | 91 days | 4.5 °C | No  | NA  | NA   | NA   |
| 229 | 1  | <i>Aeshna cyanea</i>          | 8 | 1456 | 91 days | 4.5 °C | Yes | No  | 805  | NA   |
| 230 | 9  | <i>Gasterosteus aculeatus</i> | 8 | 999  | 61 days | 1.5 °C | Yes | Yes | 703  | 869  |

|     |    |                               |    |      |         |        |     |    |     |    |           |
|-----|----|-------------------------------|----|------|---------|--------|-----|----|-----|----|-----------|
| 231 | 4  | <i>Notonecta</i> sp.          | 8  | 654  | 91 days | 1.5 °C | No  | NA | NA  | NA |           |
| 232 | 10 | control                       | 8  | 1716 | 61 days | 1.5 °C | Yes |    | Yes |    | 1212 1344 |
| 233 | 9  | <i>Notonecta</i> sp.          | 8  | 783  | 91 days | 1.5 °C | Yes |    | Yes |    | 616 648   |
| 234 | 7  | <i>Aeshna cyanea</i>          | 12 | 1127 | 91 days | 4.5 °C | Yes |    | Yes |    | 821 785   |
| 235 | 10 | <i>Gasterosteus aculeatus</i> | 12 | 1488 | 91 days | 1.5 °C | No  | NA |     | NA | NA        |
| 236 | 1  | <i>Notonecta</i> sp.          | 12 | 1380 | 61 days | 1.5 °C | Yes |    | Yes |    | 1179 1205 |
| 237 | 1  | control                       | 12 | 1229 | 91 days | 4.5 °C | Yes |    | Yes |    | 868 889   |
| 238 | 1  | <i>Aeshna cyanea</i>          | 12 | 1215 | 61 days | 1.5 °C | Yes |    | Yes |    | 951 1203  |
| 239 | 8  | <i>Aeshna cyanea</i>          | 12 | 1456 | 61 days | 1.5 °C | Yes |    | Yes |    | 990 1309  |
| 240 | 4  | <i>Gasterosteus aculeatus</i> | 12 | 786  | 91 days | 4.5 °C | Yes |    | Yes |    | 771 644   |
| 241 | 2  | <i>Aeshna cyanea</i>          | 12 | 1198 | 61 days | 4.5 °C | Yes |    | Yes |    | 952 978   |
| 242 | 3  | <i>Notonecta</i> sp.          | 12 | 826  | 61 days | 1.5 °C | Yes |    | Yes |    | 820 826   |
| 243 | 5  | <i>Gasterosteus aculeatus</i> | 12 | 1003 | 91 days | 1.5 °C | No  | NA |     | NA | NA        |
| 244 | 10 | control                       | 12 | 1259 | 61 days | 4.5 °C | Yes |    | Yes |    | 897 1185  |
| 245 | 9  | <i>Notonecta</i> sp.          | 12 | 1349 | 61 days | 4.5 °C | Yes |    | Yes |    | 1248 1276 |
| 246 | 7  | <i>Lissotriton vulgaris</i>   | 12 | 1283 | 61 days | 4.5 °C | Yes |    | Yes |    | 1076 1089 |
| 247 | 4  | <i>Notonecta</i> sp.          | 12 | 1103 | 91 days | 4.5 °C | Yes |    | Yes |    | 920 615   |
| 248 | 9  | control                       | 12 | 1132 | 61 days | 4.5 °C | Yes |    | Yes |    | 1045 1039 |
| 249 | 2  | control                       | 12 | 1390 | 61 days | 4.5 °C | Yes |    | Yes |    | 1181 1239 |
| 250 | 8  | <i>Lissotriton vulgaris</i>   | 12 | 1194 | 91 days | 1.5 °C | No  | NA |     | NA | NA        |
| 251 | 8  | <i>Notonecta</i> sp.          | 12 | 901  | 91 days | 4.5 °C | Yes |    | Yes |    | 781 615   |
| 252 | 9  | <i>Notonecta</i> sp.          | 12 | 1558 | 91 days | 1.5 °C | Yes |    | Yes |    | 1221 1262 |
| 253 | 3  | <i>Lissotriton vulgaris</i>   | 12 | 910  | 61 days | 4.5 °C | Yes |    | Yes |    | 891 981   |
| 254 | 10 | <i>Lissotriton vulgaris</i>   | 12 | 1108 | 61 days | 1.5 °C | Yes |    | Yes |    | 1025 988  |
| 255 | 1  | <i>Gasterosteus aculeatus</i> | 12 | 1559 | 91 days | 1.5 °C | Yes |    | Yes |    | 1287 1366 |
| 256 | 4  | <i>Lissotriton vulgaris</i>   | 12 | 947  | 61 days | 4.5 °C | Yes |    | Yes |    | 799 753   |
| 257 | 1  | <i>Lissotriton vulgaris</i>   | 12 | 1323 | 91 days | 4.5 °C | Yes |    | Yes |    | 784 858   |
| 258 | 7  | <i>Gasterosteus aculeatus</i> | 12 | 1062 | 61 days | 1.5 °C | Yes |    | Yes |    | 1120 1111 |

|     |    |                               |    |      |         |        |     |    |     |    |      |      |
|-----|----|-------------------------------|----|------|---------|--------|-----|----|-----|----|------|------|
| 259 | 6  | control                       | 12 | 922  | 91 days | 1.5 °C | Yes |    | Yes |    | 659  | 491  |
| 260 | 5  | control                       | 12 | 962  | 91 days | 4.5 °C | No  | NA |     | NA | NA   |      |
| 261 | 7  | control                       | 12 | 1179 | 91 days | 1.5 °C | Yes |    | Yes |    | 965  | 1029 |
| 262 | 2  | <i>Lissotriton vulgaris</i>   | 12 | 1412 | 61 days | 1.5 °C | Yes |    | Yes |    | 1411 | 1467 |
| 263 | 4  | control                       | 12 | 1485 | 61 days | 1.5 °C | Yes |    | Yes |    | 1402 | 1692 |
| 264 | 5  | <i>Lissotriton vulgaris</i>   | 12 | 1144 | 91 days | 4.5 °C | Yes |    | Yes |    | 747  | 800  |
| 265 | 6  | <i>Aeshna cyanea</i>          | 12 | 1264 | 91 days | 1.5 °C | Yes |    | Yes |    | 1087 | 1246 |
| 266 | 8  | <i>Lissotriton vulgaris</i>   | 7  | 1023 | 61 days | 4.5 °C | Yes |    | Yes |    | 804  | 1033 |
| 267 | 10 | <i>Lissotriton vulgaris</i>   | 7  | 1145 | 91 days | 1.5 °C | Yes |    | Yes |    | 827  | 1027 |
| 268 | 1  | control                       | 7  | 1918 | 91 days | 1.5 °C | Yes |    | Yes |    | 1487 | 1470 |
| 269 | 1  | <i>Lissotriton vulgaris</i>   | 7  | 1354 | 91 days | 1.5 °C | Yes |    | Yes |    | 1090 | 1251 |
| 270 | 4  | <i>Aeshna cyanea</i>          | 7  | 1172 | 61 days | 1.5 °C | Yes |    | Yes |    | 1209 | 1329 |
| 271 | 9  | <i>Aeshna cyanea</i>          | 7  | 724  | 91 days | 1.5 °C | No  | NA |     | NA | NA   |      |
| 272 | 2  | <i>Lissotriton vulgaris</i>   | 7  | 1191 | 91 days | 4.5 °C | Yes |    | Yes |    | 969  | 702  |
| 273 | 10 | <i>Aeshna cyanea</i>          | 7  | 1928 | 91 days | 1.5 °C | Yes |    | Yes |    | 1568 | 1112 |
| 274 | 7  | <i>Aeshna cyanea</i>          | 7  | 1638 | 61 days | 1.5 °C | Yes |    | Yes |    | 1477 | 1585 |
| 275 | 8  | <i>Notonecta</i> sp.          | 7  | 1266 | 91 days | 1.5 °C | Yes |    | Yes |    | 1112 | 698  |
| 276 | 9  | <i>Gasterosteus aculeatus</i> | 7  | 1966 | 61 days | 1.5 °C | Yes |    | Yes |    | 1778 | 1898 |
| 277 | 7  | control                       | 7  | 1617 | 91 days | 1.5 °C | Yes |    | Yes |    | 1530 | 1384 |
| 278 | 3  | <i>Notonecta</i> sp.          | 7  | 1343 | 61 days | 1.5 °C | Yes |    | Yes |    | 1209 | 1433 |
| 279 | 4  | <i>Notonecta</i> sp.          | 7  | 1062 | 91 days | 4.5 °C | Yes |    | Yes |    | 779  | 834  |
| 280 | 2  | control                       | 7  | 1095 | 61 days | 1.5 °C | Yes |    | No  |    | 895  | NA   |
| 281 | 9  | <i>Lissotriton vulgaris</i>   | 7  | 2080 | 91 days | 1.5 °C | Yes |    | Yes |    | 1944 | 1648 |
| 282 | 2  | <i>Aeshna cyanea</i>          | 7  | 1113 | 61 days | 1.5 °C | Yes |    | Yes |    | 1170 | 1372 |
| 283 | 3  | <i>Aeshna cyanea</i>          | 7  | 967  | 91 days | 4.5 °C | Yes |    | Yes |    | 691  | 682  |
| 284 | 10 | <i>Gasterosteus aculeatus</i> | 7  | 1906 | 91 days | 4.5 °C | Yes |    | Yes |    | 1543 | 1456 |
| 285 | 5  | <i>Gasterosteus aculeatus</i> | 7  | 785  | 91 days | 4.5 °C | No  | NA |     | NA | NA   |      |
| 286 | 5  | <i>Lissotriton vulgaris</i>   | 7  | 1033 | 61 days | 1.5 °C | Yes |    | Yes |    | 820  | 1052 |

|     |    |                               |    |      |         |        |     |     |      |      |
|-----|----|-------------------------------|----|------|---------|--------|-----|-----|------|------|
| 287 | 9  | <i>Notonecta</i> sp.          | 7  | 1710 | 61 days | 1.5 °C | Yes | Yes | 1489 | 1667 |
| 288 | 9  | control                       | 7  | 1797 | 61 days | 1.5 °C | Yes | Yes | 1678 | 1884 |
| 289 | 6  | <i>Lissotriton vulgaris</i>   | 7  | 1154 | 61 days | 4.5 °C | Yes | Yes | 859  | 992  |
| 290 | 8  | <i>Aeshna cyanea</i>          | 7  | 1089 | 91 days | 1.5 °C | Yes | Yes | 833  | 994  |
| 291 | 8  | control                       | 7  | 929  | 61 days | 1.5 °C | No  | NA  | NA   | NA   |
| 292 | 8  | <i>Notonecta</i> sp.          | 7  | 1360 | 61 days | 1.5 °C | Yes | Yes | 1195 | 1258 |
| 293 | 7  | <i>Lissotriton vulgaris</i>   | 7  | 1199 | 91 days | 4.5 °C | Yes | Yes | 824  | 658  |
| 294 | 4  | control                       | 7  | 1122 | 91 days | 1.5 °C | Yes | Yes | 770  | 841  |
| 295 | 1  | <i>Aeshna cyanea</i>          | 7  | 1521 | 61 days | 1.5 °C | Yes | Yes | 1201 | 1430 |
| 296 | 10 | control                       | 7  | 2187 | 91 days | 4.5 °C | Yes | Yes | 1990 | 1986 |
| 298 | 7  | <i>Notonecta</i> sp.          | 7  | 1521 | 91 days | 4.5 °C | Yes | No  | 885  | NA   |
| 299 | 1  | <i>Notonecta</i> sp.          | 7  | 2015 | 61 days | 4.5 °C | Yes | No  | 1293 | NA   |
| 300 | 3  | control                       | 11 | 849  | 91 days | 4.5 °C | Yes | Yes | 657  | 718  |
| 301 | 9  | <i>Gasterosteus aculeatus</i> | 11 | 1425 | 61 days | 4.5 °C | Yes | Yes | 1227 | 1819 |
| 302 | 10 | control                       | 11 | 1958 | 91 days | 1.5 °C | Yes | Yes | 1597 | 1415 |
| 303 | 8  | control                       | 11 | 897  | 91 days | 4.5 °C | Yes | Yes | 887  | 979  |
| 304 | 1  | <i>Lissotriton vulgaris</i>   | 11 | 1644 | 91 days | 4.5 °C | Yes | Yes | 1426 | 1528 |
| 305 | 8  | <i>Notonecta</i> sp.          | 11 | 949  | 61 days | 4.5 °C | Yes | Yes | 868  | 1011 |
| 306 | 2  | <i>Notonecta</i> sp.          | 11 | 1104 | 61 days | 1.5 °C | No  | NA  | NA   | NA   |
| 307 | 8  | <i>Aeshna cyanea</i>          | 11 | 1259 | 91 days | 1.5 °C | Yes | No  | 718  | NA   |
| 308 | 9  | <i>Aeshna cyanea</i>          | 11 | 2472 | 61 days | 4.5 °C | Yes | Yes | 1952 | 2890 |
| 309 | 1  | <i>Notonecta</i> sp.          | 11 | 986  | 61 days | 4.5 °C | Yes | Yes | 876  | 1116 |
| 310 | 8  | <i>Lissotriton vulgaris</i>   | 11 | 1870 | 61 days | 1.5 °C | Yes | Yes | 1598 | 1809 |
| 311 | 5  | <i>Aeshna cyanea</i>          | 11 | 1351 | 61 days | 4.5 °C | Yes | Yes | 1040 | 1221 |
| 312 | 8  | <i>Gasterosteus aculeatus</i> | 11 | 1309 | 61 days | 1.5 °C | Yes | Yes | 985  | 1176 |
| 313 | 2  | control                       | 11 | 1434 | 91 days | 4.5 °C | Yes | Yes | 1263 | 1333 |
| 314 | 5  | <i>Gasterosteus aculeatus</i> | 11 | 1651 | 61 days | 4.5 °C | Yes | Yes | 1349 | 1569 |
| 315 | 7  | <i>Lissotriton vulgaris</i>   | 11 | 1487 | 91 days | 1.5 °C | No  | NA  | NA   | NA   |

|     |    |                               |    |      |         |        |     |     |      |      |
|-----|----|-------------------------------|----|------|---------|--------|-----|-----|------|------|
| 316 | 10 | <i>Lissotriton vulgaris</i>   | 11 | 1682 | 61 days | 4.5 °C | Yes | Yes | 1626 | 1933 |
| 317 | 3  | <i>Gasterosteus aculeatus</i> | 11 | 1299 | 61 days | 4.5 °C | Yes | Yes | 1082 | 952  |
| 318 | 7  | <i>Aeshna cyanea</i>          | 11 | 1468 | 61 days | 1.5 °C | Yes | Yes | 1064 | 1282 |
| 319 | 10 | <i>Gasterosteus aculeatus</i> | 11 | 831  | 61 days | 4.5 °C | Yes | Yes | 759  | 1032 |
| 320 | 10 | <i>Notonecta</i> sp.          | 11 | 2205 | 91 days | 1.5 °C | Yes | Yes | 1670 | 1364 |
| 321 | 10 | <i>Aeshna cyanea</i>          | 11 | 1611 | 91 days | 4.5 °C | Yes | Yes | 1415 | 1192 |
| 322 | 3  | <i>Notonecta</i> sp.          | 11 | 837  | 61 days | 4.5 °C | Yes | Yes | 668  | 867  |
| 323 | 2  | <i>Lissotriton vulgaris</i>   | 11 | 1275 | 61 days | 4.5 °C | Yes | Yes | 1239 | 1638 |
| 324 | 6  | <i>Lissotriton vulgaris</i>   | 11 | 1237 | 61 days | 1.5 °C | Yes | Yes | 1220 | 1416 |
| 325 | 7  | <i>Gasterosteus aculeatus</i> | 11 | 1573 | 91 days | 4.5 °C | No  | NA  | NA   | NA   |
| 326 | 1  | <i>Aeshna cyanea</i>          | 11 | 1458 | 61 days | 4.5 °C | Yes | Yes | 1214 | 1177 |
| 327 | 9  | <i>Lissotriton vulgaris</i>   | 11 | 2360 | 61 days | 4.5 °C | Yes | Yes | 2100 | 2099 |
| 328 | 6  | <i>Aeshna cyanea</i>          | 11 | 863  | 61 days | 1.5 °C | Yes | Yes | 640  | 679  |
| 329 | 5  | <i>Lissotriton vulgaris</i>   | 11 | 1283 | 91 days | 1.5 °C | No  | NA  | NA   | NA   |
| 330 | 9  | control                       | 11 | 1555 | 61 days | 4.5 °C | Yes | Yes | 1366 | 1600 |
| 331 | 10 | <i>Lissotriton vulgaris</i>   | 9  | 1263 | 91 days | 4.5 °C | Yes | Yes | 911  | 1017 |
| 332 | 2  | <i>Aeshna cyanea</i>          | 9  | 860  | 91 days | 4.5 °C | Yes | Yes | 695  | 899  |
| 333 | 8  | control                       | 9  | 601  | 91 days | 1.5 °C | No  | NA  | NA   | NA   |
| 334 | 3  | <i>Lissotriton vulgaris</i>   | 9  | 819  | 91 days | 4.5 °C | Yes | Yes | 667  | 426  |
| 335 | 4  | <i>Aeshna cyanea</i>          | 9  | 805  | 91 days | 1.5 °C | Yes | Yes | 889  | 779  |
| 336 | 1  | <i>Aeshna cyanea</i>          | 9  | 783  | 61 days | 4.5 °C | Yes | Yes | 631  | 565  |
| 337 | 1  | control                       | 9  | 754  | 61 days | 1.5 °C | Yes | Yes | 627  | 738  |
| 338 | 2  | control                       | 9  | 707  | 91 days | 1.5 °C | Yes | Yes | 750  | 577  |
| 339 | 5  | <i>Aeshna cyanea</i>          | 9  | 950  | 91 days | 1.5 °C | No  | NA  | NA   | NA   |
| 340 | 9  | <i>Notonecta</i> sp.          | 9  | 1343 | 91 days | 1.5 °C | Yes | Yes | 1095 | 1352 |
| 341 | 8  | <i>Gasterosteus aculeatus</i> | 9  | 553  | 61 days | 1.5 °C | No  | NA  | NA   | NA   |
| 342 | 10 | <i>Notonecta</i> sp.          | 9  | 1897 | 91 days | 1.5 °C | No  | NA  | NA   | NA   |
| 343 | 2  | <i>Lissotriton vulgaris</i>   | 9  | 965  | 61 days | 1.5 °C | Yes | Yes | 873  | 1006 |

|            |    |                               |    |      |         |        |     |    |     |      |      |
|------------|----|-------------------------------|----|------|---------|--------|-----|----|-----|------|------|
| 344        | 4  | <i>Gasterosteus aculeatus</i> | 9  | 755  | 61 days | 1.5 °C | Yes |    | Yes | 774  | 941  |
| 345        | 6  | control                       | 9  | 481  | 61 days | 4.5 °C | No  | NA | NA  | NA   |      |
| 346        | 9  | control                       | 9  | 1352 | 61 days | 4.5 °C | Yes |    | Yes | 1103 | 1207 |
| 347        | 6  | <i>Lissotriton vulgaris</i>   | 9  | 530  | 91 days | 1.5 °C | No  | NA | NA  | NA   |      |
| 348        | 4  | <i>Notonecta</i> sp.          | 9  | 696  | 61 days | 1.5 °C | Yes |    | Yes | 675  | 858  |
| 349        | 10 | control                       | 9  | 1325 | 91 days | 1.5 °C | Yes |    | Yes | 745  | 918  |
| 350        | 9  | <i>Lissotriton vulgaris</i>   | 9  | 1085 | 91 days | 1.5 °C | No  | NA | NA  | NA   |      |
| 351        | 2  | <i>Gasterosteus aculeatus</i> | 9  | 740  | 61 days | 4.5 °C | Yes |    | Yes | 710  | 773  |
| 352        | 1  | <i>Lissotriton vulgaris</i>   | 9  | 1100 | 91 days | 4.5 °C | Yes |    | Yes | 921  | 782  |
| 353        | 3  | control                       | 9  | 743  | 91 days | 1.5 °C | No  | NA | NA  | NA   |      |
| 354        | 10 | <i>Aeshna cyanea</i>          | 9  | 803  | 91 days | 4.5 °C | Yes |    | Yes | 704  | 622  |
| 355        | 9  | <i>Aeshna cyanea</i>          | 9  | 1078 | 91 days | 4.5 °C | Yes |    | Yes | 929  | 863  |
| 356        | 5  | <i>Gasterosteus aculeatus</i> | 9  | 784  | 61 days | 4.5 °C | Yes |    | Yes | 702  | 873  |
| 357        | 8  | <i>Lissotriton vulgaris</i>   | 9  | 1107 | 61 days | 1.5 °C | Yes |    | Yes | 947  | 975  |
| 358        | 4  | control                       | 9  | 821  | 61 days | 1.5 °C | Yes |    | Yes | 571  | 532  |
| 359        | 7  | <i>Lissotriton vulgaris</i>   | 9  | 596  | 91 days | 4.5 °C | Yes |    | Yes | 542  | 432  |
| 360        | 6  | <i>Gasterosteus aculeatus</i> | 9  | 812  | 61 days | 1.5 °C | Yes |    | Yes | 701  | 943  |
| 361        | 5  | control                       | 9  | 641  | 61 days | 1.5 °C | Yes |    | No  | 414  | NA   |
| 362        | 3  | <i>Notonecta</i> sp.          | 9  | 831  | 91 days | 4.5 °C | Yes |    | Yes | 683  | 537  |
| 363        | 7  | <i>Gasterosteus aculeatus</i> | 9  | 961  | 61 days | 4.5 °C | Yes |    | Yes | 851  | 976  |
| 364        | 10 | <i>Gasterosteus aculeatus</i> | 9  | 1278 | 61 days | 1.5 °C | Yes |    | No  | 831  | NA   |
| 375        | 7  | <i>Aeshna cyanea</i>          | 10 | 1157 | 91 days | 1.5 °C | Yes |    | No  | 634  | NA   |
| 376        | 5  | control                       | 10 | 1225 | 61 days | 1.5 °C | No  | NA | NA  | NA   |      |
| 377        | 1  | <i>Gasterosteus aculeatus</i> | 10 | 1213 | 91 days | 4.5 °C | Yes |    | Yes | 1055 | 1194 |
| <b>378</b> | 4  | <i>Lissotriton vulgaris</i>   | 10 | 1467 | 61 days | 1.5 °C | NA  | NA | NA  | NA   |      |
| 379        | 6  | <i>Notonecta</i> sp.          | 10 | 965  | 91 days | 4.5 °C | Yes |    | Yes | 804  | 675  |
| 380        | 7  | <i>Lissotriton vulgaris</i>   | 10 | 1634 | 91 days | 4.5 °C | Yes |    | Yes | 1467 | 1655 |
| 381        | 7  | control                       | 10 | 968  | 61 days | 4.5 °C | Yes |    | Yes | 937  | 1068 |



|     |    |                               |    |      |         |        |     |     |      |      |
|-----|----|-------------------------------|----|------|---------|--------|-----|-----|------|------|
| 382 | 6  | <i>Lissotriton vulgaris</i>   | 10 | 1228 | 91 days | 4.5 °C | Yes | Yes | 1052 | 1140 |
| 383 | 10 | control                       | 10 | 1791 | 61 days | 4.5 °C | Yes | Yes | 1644 | 2226 |
| 384 | 9  | control                       | 10 | 1979 | 91 days | 4.5 °C | Yes | Yes | 1585 | 1635 |
| 385 | 4  | <i>Notonecta</i> sp.          | 10 | 1204 | 91 days | 1.5 °C | Yes | Yes | 914  | 609  |
| 386 | 2  | <i>Gasterosteus aculeatus</i> | 10 | 1554 | 91 days | 4.5 °C | Yes | Yes | 1459 | 1422 |
| 387 | 8  | <i>Lissotriton vulgaris</i>   | 10 | 1577 | 61 days | 4.5 °C | Yes | Yes | 1573 | 1694 |
| 388 | 9  | <i>Aeshna cyanea</i>          | 10 | 3279 | 91 days | 4.5 °C | Yes | Yes | 3138 | 3393 |
| 389 | 2  | <i>Notonecta</i> sp.          | 10 | 1124 | 91 days | 4.5 °C | Yes | Yes | 962  | 951  |
| 390 | 10 | <i>Aeshna cyanea</i>          | 10 | 1201 | 91 days | 1.5 °C | Yes | Yes | 836  | 673  |
| 391 | 1  | control                       | 10 | 1297 | 91 days | 4.5 °C | Yes | Yes | 1296 | 1089 |
| 392 | 6  | <i>Notonecta</i> sp.          | 10 | 1364 | 91 days | 4.5 °C | Yes | Yes | 1207 | 1026 |
| 393 | 8  | <i>Gasterosteus aculeatus</i> | 10 | 1226 | 91 days | 1.5 °C | Yes | Yes | 751  | 855  |
| 394 | 8  | <i>Aeshna cyanea</i>          | 10 | 1347 | 61 days | 4.5 °C | Yes | Yes | 1233 | 1586 |
| 395 | 4  | control                       | 10 | 1016 | 61 days | 4.5 °C | Yes | Yes | 972  | 1300 |
| 396 | 9  | <i>Notonecta</i> sp.          | 10 | 1250 | 61 days | 4.5 °C | Yes | Yes | 1051 | 1321 |

**Table S5.** Temperature regimes experienced by juvenile common toads in different hibernation scenarios. Temperatures were obtained by placing three data loggers each in two laboratory refrigerators set to 1.5 and 4.5 °C, respectively. Means  $\pm$  s.d. are presented.

| Hibernation scenario | Temperature (°C)  |                   |                   | Mean              |
|----------------------|-------------------|-------------------|-------------------|-------------------|
|                      | Data logger 1     | Data logger 2     | Data logger 3     |                   |
| 1.5 °C, 91 days      | 0.863 $\pm$ 0.535 | 1.202 $\pm$ 0.446 | 1.822 $\pm$ 0.707 | 1.306 $\pm$ 0.719 |
| 1.5 °C, 61 days      | 0.942 $\pm$ 0.421 | 1.211 $\pm$ 0.359 | 2.203 $\pm$ 0.380 | 1.452 $\pm$ 0.667 |
| 4.5 °C, 91 days      | 3.74 $\pm$ 0.409  | 4.469 $\pm$ 0.309 | 4.824 $\pm$ 0.318 | 4.291 $\pm$ 0.567 |
| 4.5 °C, 61 days      | 3.822 $\pm$ 0.342 | 4.488 $\pm$ 0.289 | 4.846 $\pm$ 0.294 | 4.385 $\pm$ 0.525 |

**Table S6.** Effects of the three-way interaction of hibernation temperature, hibernation length and mass before hibernation. Results were obtained from type III analysis-of-deviance tables with Wald  $\chi^2$  tests using the car package in R. Terms including larval environment could not be estimated because in some subgroups there was no variance (all individuals survived), but corresponding graphs did not suggest significant effects of larval environment. Graphs are available from the authors upon request.

|                                                                                      | N   | $\chi^2$ | df | P     |
|--------------------------------------------------------------------------------------|-----|----------|----|-------|
| <u>Survival after hibernation</u>                                                    |     |          |    |       |
| intercept                                                                            | 325 | 3.42     | 1  | 0.065 |
| hibernation length                                                                   |     | 0.23     | 1  | 0.629 |
| hibernation temperature                                                              |     | 8.84     | 1  | 0.003 |
| mass before hibernation                                                              |     | 4.38     | 1  | 0.037 |
| hibernation length $\times$ hibernation temperature                                  |     | 4.43     | 1  | 0.035 |
| hibernation length $\times$ mass before hibernation                                  |     | 0.28     | 1  | 0.596 |
| hibernation temperature $\times$ mass before hibernation                             |     | 8.71     | 1  | 0.003 |
| hibernation length $\times$ hibernation temperature $\times$ mass before hibernation |     | 4.35     | 1  | 0.037 |

**Table S7.** Main effects and interactions in analyses of survival and body mass change after hibernation. Non-significant effects were calculated by including each effect separately into the final models (containing only the significant effects, marked with asterisk). Results were obtained from type III analysis-of-deviance tables with Wald  $\chi^2$  tests using the car package in R. In case of survival, terms including larval environment could not be estimated because in some subgroups there was no variance (all individuals survived), but corresponding graphs did not suggest significant effects of larval environment. Graphs are available from the authors upon request.

|                                                                                      | N   | $\chi^2$ | df | P      |
|--------------------------------------------------------------------------------------|-----|----------|----|--------|
| <u>Survival after hibernation</u>                                                    |     |          |    |        |
| intercept                                                                            | 325 | 41.56    | 1  | <0.001 |
| hibernation length                                                                   |     | 2.76     | 1  | 0.097  |
| hibernation temperature *                                                            |     | 4.47     | 1  | 0.035  |
| hibernation length $\times$ hibernation temperature                                  |     | 0.29     | 1  | 0.592  |
| <u>Body mass change after hibernation</u>                                            |     |          |    |        |
| intercept                                                                            | 297 | 39.29    | 1  | <0.001 |
| hibernation length *                                                                 |     | 28.71    | 1  | <0.001 |
| hibernation temperature *                                                            |     | 4.91     | 1  | 0.027  |
| larval environment                                                                   |     | 9.36     | 4  | 0.053  |
| mass before hibernation                                                              |     | 0.30     | 1  | 0.586  |
| hibernation length $\times$ hibernation temperature *                                |     | 4.96     | 1  | 0.026  |
| hibernation length $\times$ larval environment                                       |     | 2.42     | 4  | 0.659  |
| hibernation length $\times$ mass before hibernation                                  |     | 1.25     | 1  | 0.265  |
| hibernation temperature $\times$ larval environment                                  |     | 1.03     | 4  | 0.906  |
| hibernation temperature $\times$ mass before hibernation                             |     | 0.10     | 1  | 0.756  |
| larval environment $\times$ mass before hibernation                                  |     | 1.20     | 4  | 0.879  |
| hibernation length $\times$ hibernation temperature $\times$ mass before hibernation |     | 0.20     | 1  | 0.653  |
| hibernation length $\times$ larval environment $\times$ mass before hibernation      |     | 5.40     | 4  | 0.249  |
| hibernation temperature $\times$ larval environment $\times$ mass before hibernation |     | 2.70     | 4  | 0.609  |
| larval environment $\times$ hibernation length $\times$ hibernation temperature      |     | 5.96     | 4  | 0.202  |

**Figure S1.** Effects of larval environment on the survival of toadlets during hibernation

(N=371). Abbreviations as follows: C: control (no predators), N: *Notonecta* sp., A: *Aeshna cyanea*, G: *Gasterosteus aculeatus*, L: *Lissotriton vulgaris*.

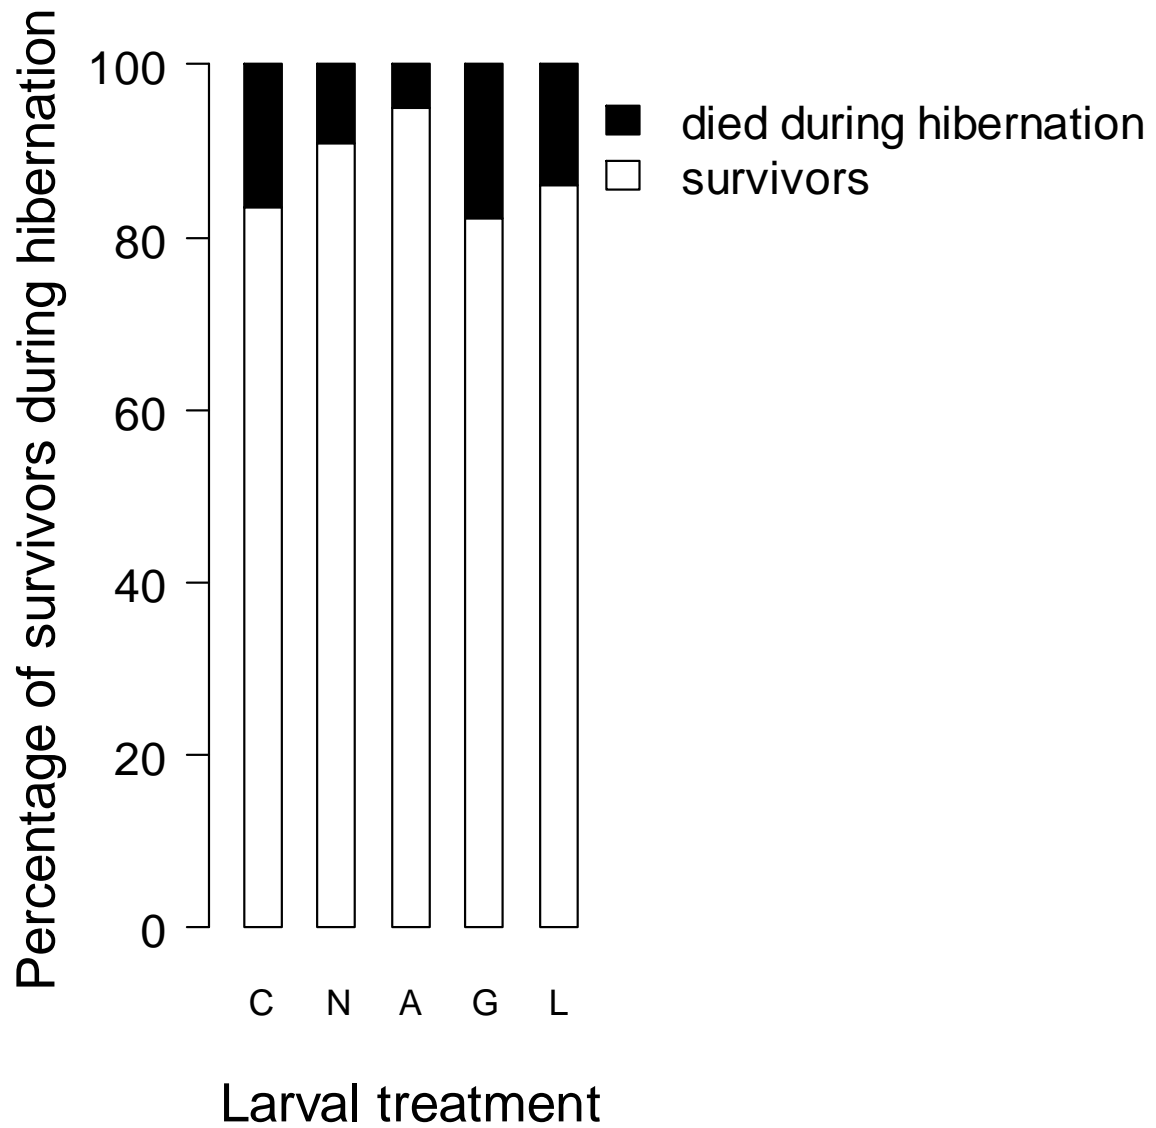

**Figure S2.** Numbers of surviving and dead toadlets during and after hibernation in our experiment.

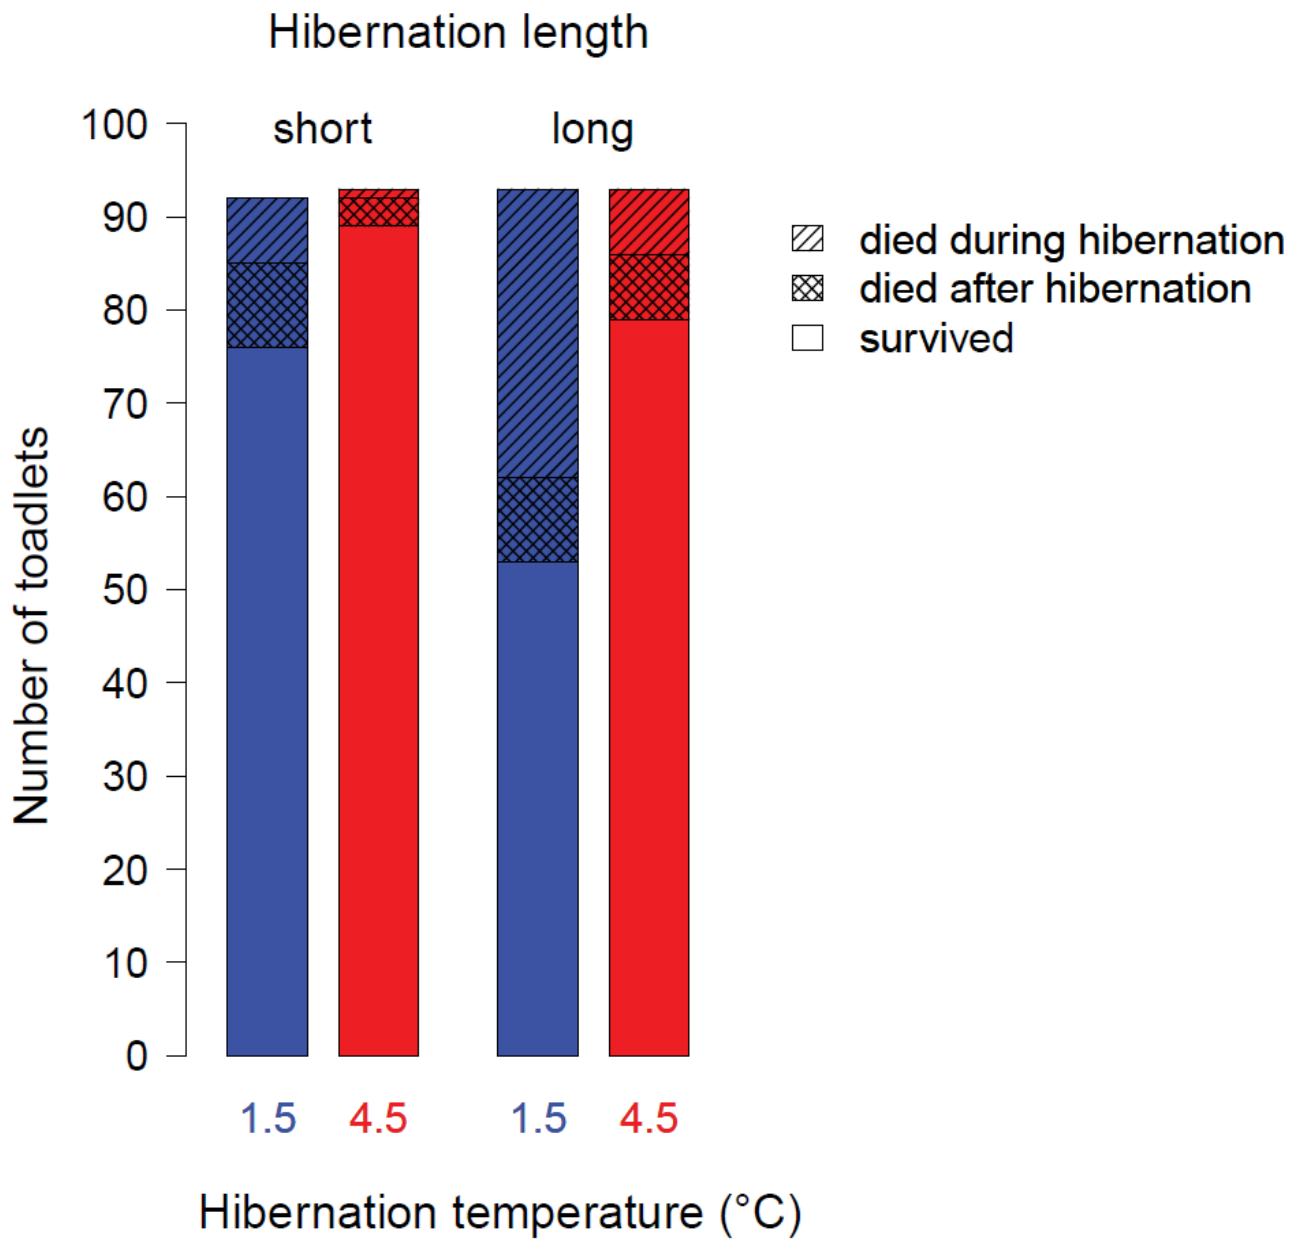

**Figure S3.** Pre-hibernation mass and sample size of toadlets that died or survived after hibernation. A significant three-way interaction effect on survival after hibernation was caused by a few large dead toadlets in the 4.5 °C, short hibernation scenario that had experienced large mass loss during hibernation. Sample sizes are presented above error bars.

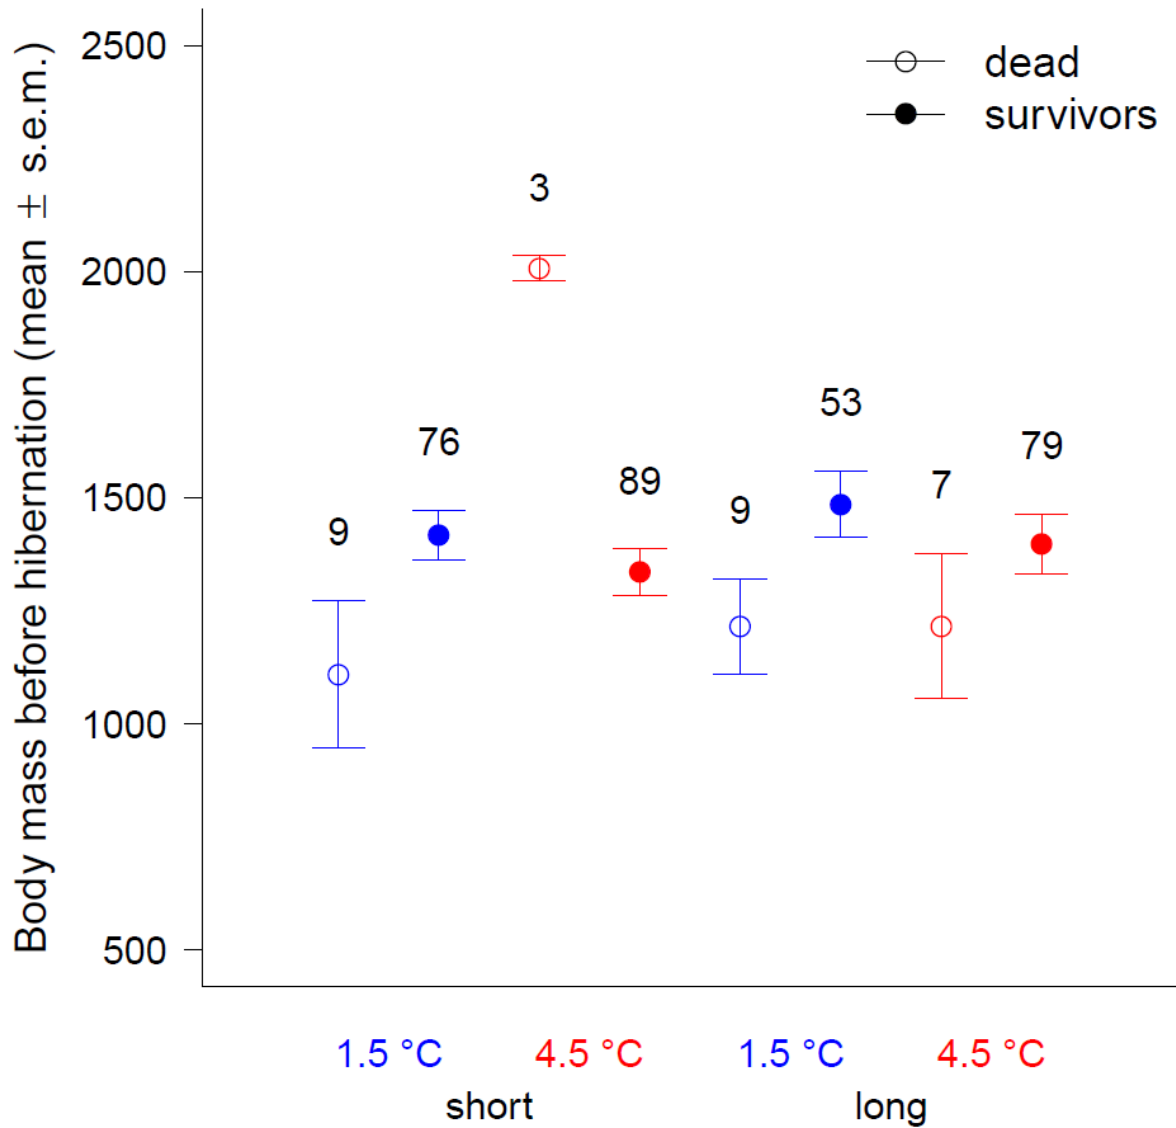

**Figure S4.** Body mass change of toadlets between two consecutive weighing occasions after hibernation. Body mass change was calculated as mass three weeks after hibernation/mass one week after hibernation. Values larger than 1 indicate body mass gain. Letters above error bars represent pairwise comparisons; groups marked with different letters differ significantly based on linear contrasts corrected for false discovery rate.

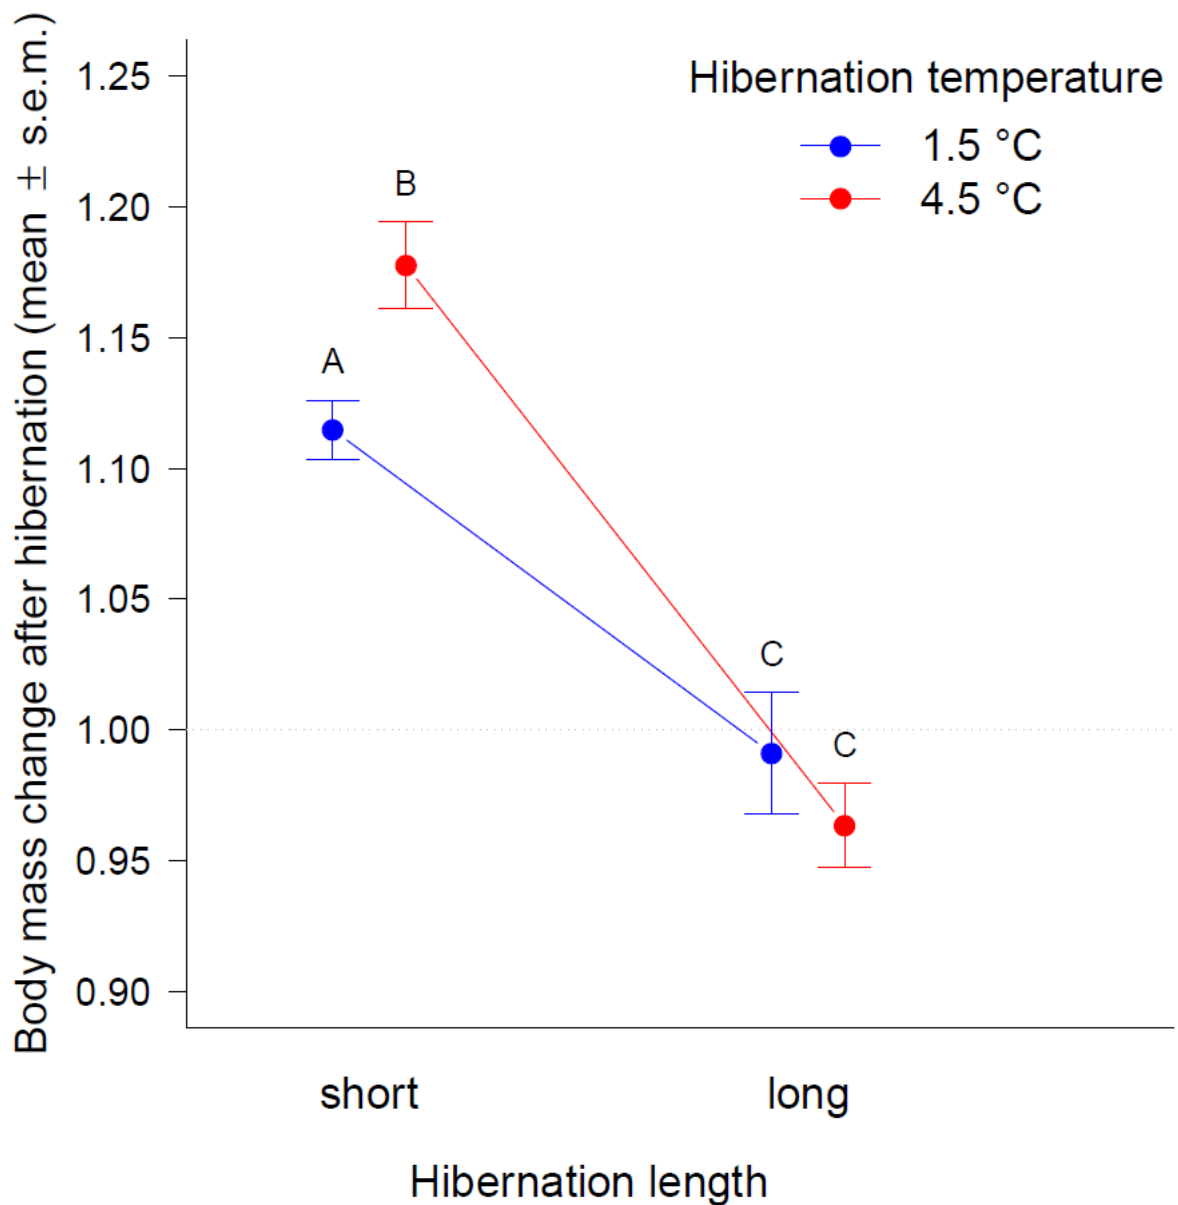



**Figure S5.** Body mass change of toadlets from different larval environments between two consecutive weighing occasions after hibernation. Body mass change was calculated as mass three weeks after hibernation/mass one week after hibernation. Values above 1 indicate body mass gain. Abbreviations as follows: C: control (no predators), N: *Notonecta* sp., A: *Aeshna cyanea*, G: *Gasterosteus aculeatus*, L: *Lissotriton vulgaris*.

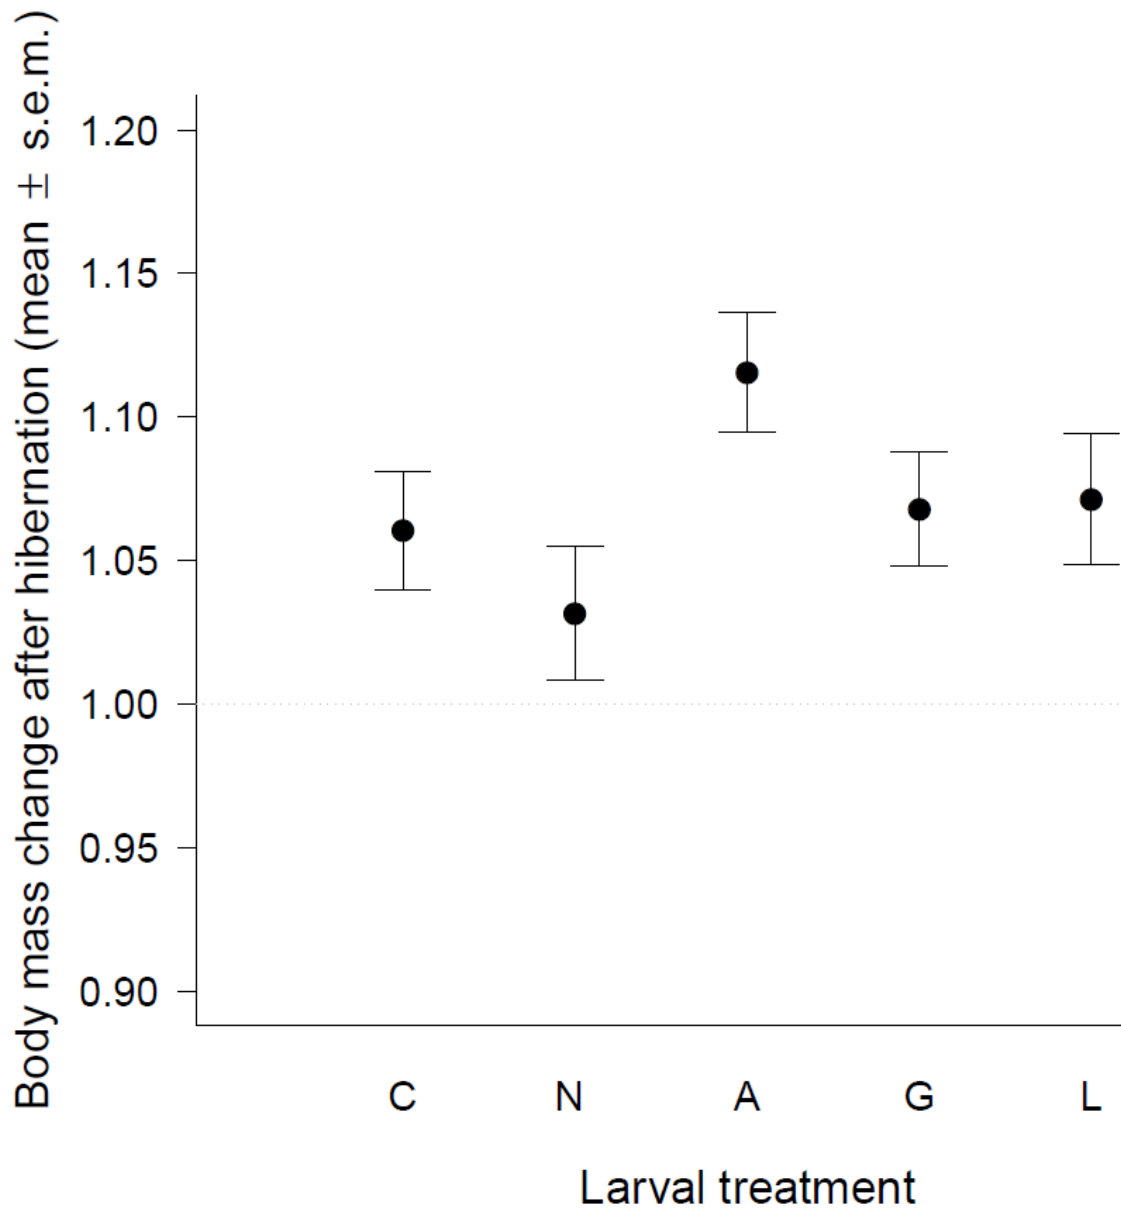

Supplement: srep26754-s1.pdf [file srep26754-s1.pdf]
